1 **Phylogenomics reveals dynamic evolution of fungal nitric oxide reductases and their**  
2 **relationship to secondary metabolism**

3 ***Running title:***

4 **Phylogenomics link *p450nor* to secondary metabolism**  
5

6 ***Authors:***

7 Steven A. Higgins<sup>1,3</sup>, Christopher W. Schadt<sup>1,2,3</sup>, Patrick B. Matheny<sup>4</sup>, and Frank E.  
8 Löffler<sup>1,2,3,5,6,7\*</sup>

9 ***Author Affiliations:***

10 <sup>1</sup>Department of Microbiology, University of Tennessee, Knoxville, TN, 37996, USA.

11 <sup>2</sup>University of Tennessee and Oak Ridge National Laboratory (UT-ORNL) Joint Institute for  
12 Biological Sciences (JIBS), Oak Ridge, Tennessee, USA.

13 <sup>3</sup>Biosciences Division, Oak Ridge National Laboratory, Oak Ridge, Tennessee, USA.

14 <sup>4</sup>Department of Ecology and Evolutionary Biology, University of Tennessee, Knoxville,  
15 Tennessee, USA.

16 <sup>5</sup>Department of Civil and Environmental Engineering, University of Tennessee, Knoxville,  
17 Tennessee, USA.

18 <sup>6</sup>Department of Biosystems Engineering & Soil Science, University of Tennessee, Knoxville,  
19 Tennessee, USA.

20 <sup>7</sup>Center for Environmental Biotechnology, University of Tennessee, Knoxville, Tennessee, USA.  
21

22 ***\*Correspondence to:***

23 Frank E. Löffler  
24 706 Science and Engineering Building  
25 1414 Circle Drive  
26 Knoxville, TN 37996-2000  
27 865-974-4933  
28 frank.loeffler@utk.edu  
29

30 ***Keywords:***

31 P450nor, fungi, nitrous oxide, secondary metabolism, nitrogen cycle, nitric oxide, horizontal  
32 gene transfer  
33

34

35

36 **Abstract**

37 Fungi expressing P450<sub>nor</sub>, an unconventional nitric oxide (NO) reducing cytochrome P450, are  
38 thought to be significant contributors to soil nitrous oxide (N<sub>2</sub>O) emissions. However, fungal  
39 contributions to N<sub>2</sub>O emissions remain uncertain due to inconsistencies in measurements of N<sub>2</sub>O  
40 formation by fungi. Much of the N<sub>2</sub>O emitted from antibiotic-amended soil microcosms is  
41 attributed to fungal activity, yet fungal isolates examined in pure culture are poor N<sub>2</sub>O producers.  
42 To assist in reconciling these conflicting observations and produce a benchmark genomic  
43 analysis of fungal denitrifiers, genes underlying fungal denitrification were examined in >700  
44 fungal genomes. Of 167 *p450<sub>nor</sub>*-containing genomes identified, 0, 30, and 48 also harbored the  
45 denitrification genes *narG*, *napA* or *nirK*, respectively. Compared to *napA* and *nirK*, *p450<sub>nor</sub>*  
46 was twice as abundant and exhibited two to five-fold more gene duplications, losses, and  
47 transfers, indicating a disconnect between *p450<sub>nor</sub>* presence and denitrification potential.  
48 Furthermore, co-occurrence of *p450<sub>nor</sub>* with genes encoding NO-detoxifying flavohemoglobins  
49 (Spearman  $r = 0.87$ ,  $p = 1.6e^{-10}$ ) confounds hypotheses regarding P450<sub>nor</sub>'s primary role in NO  
50 detoxification. Instead, ancestral state reconstruction united P450<sub>nor</sub> with actinobacterial  
51 cytochrome P450s (CYP105) involved in secondary metabolism (SM) and 19 (11 %) *p450<sub>nor</sub>*-  
52 containing genomic regions were predicted to be SM clusters. Another 40 (24 %) genomes  
53 harbored genes nearby *p450<sub>nor</sub>* predicted to encode hallmark SM functions, providing additional  
54 contextual evidence linking *p450<sub>nor</sub>* to SM. These findings underscore the potential  
55 physiological implications of widespread *p450<sub>nor</sub>* gene transfer, support the novel affiliation of  
56 *p450<sub>nor</sub>* with fungal SM, and challenge the hypothesis of *p450<sub>nor</sub>*'s primary role in  
57 denitrification.

58

## 59 **Importance**

60 Fungi are considered substantial contributors to emissions of the greenhouse gas N<sub>2</sub>O, owing to  
61 the nitric oxide reducing potential of an unusual cytochrome P450 (P450<sub>nor</sub>). Despite these  
62 findings, fungi do not satisfy criteria to be classified as respiratory denitrifiers and  
63 methodological biases confound fungal contributions to the N<sub>2</sub>O budget. Phylogenetic and  
64 genomic analyses distanced N<sub>2</sub>O-forming fungi from denitrification and supported a new link  
65 between P450<sub>nor</sub> and SM. Hence, N<sub>2</sub>O formed by P450<sub>nor</sub> activity may be artificially induced  
66 or a byproduct of SM. Explorations of P450<sub>nor</sub>'s involvement in SM may facilitate the discovery  
67 of new compounds with potential applications in agricultural and pharmaceutical industries.  
68 Dissociating *p450<sub>nor</sub>* from denitrification also informs climate change models and directs  
69 research towards organisms and processes most relevant to *in situ* N<sub>2</sub>O production.

70

## 71 **Introduction**

72 Increased human reliance on fixed nitrogen (N) from the Haber-Bosch process to meet the  
73 demands of sustaining an expanding global population has contributed to a 20 % increase in  
74 atmospheric nitrous oxide (N<sub>2</sub>O), a potent greenhouse gas with ozone destruction potential (1, 2).  
75 N<sub>2</sub>O is primarily formed by denitrifying members of the *Bacteria* and *Archaea* (3), a prevailing  
76 view that has been challenged by experiments reporting that abundant soil- and sediment-  
77 inhabiting fungi contribute up to 89 % of the total N<sub>2</sub>O emitted from these systems (4–6).  
78 Notably, fungi cannot convert N<sub>2</sub>O to inert N<sub>2</sub> like many denitrifying bacteria (7), suggesting  
79 their contributions to greenhouse effects and ozone destruction could be significant. Fungi are  
80 considered to be important sources of N<sub>2</sub>O emissions from agroecosystems (8, 9), which are  
81 predicted to contribute up to two-thirds of the total N<sub>2</sub>O emissions by 2030 (10). Studies of

82 model fungi show that N<sub>2</sub>O formation is due to P450nor, a heme-containing cytochrome P450,  
83 that catalyzes the two electron reduction of nitric oxide (NO) to N<sub>2</sub>O (11–13). N<sub>2</sub>O formation by  
84 P450nor is thought to occur exclusively in fungi and the *p450nor* gene has been exploited as a  
85 distinctive biomarker in molecular assays to study fungal denitrifier diversity and abundance in  
86 the environment (14–16).

87         Despite these observations, the fungal contributions to N<sub>2</sub>O emissions remain uncertain.  
88 For example, fungi do not satisfy criteria set forth to classify microorganisms as respiratory  
89 denitrifiers (17). N<sub>2</sub>O-producing fungi in pure culture do not exhibit a balance between the  
90 inorganic N inputs and quantities of N<sub>2</sub>O formed (18–20) and possess three to six orders of  
91 magnitude lower rates of N<sub>2</sub>O production compared to denitrifying bacterial isolates under  
92 optimal conditions (4). Fungi also fail to generate anoxic growth yields proportional to the  
93 quantity of inorganic N reduced in pure culture (6, 21–23), and no significant relationship was  
94 detected between fungal denitrification activity and fungal biomass in anoxic soil incubations  
95 (24). Above all, partitioning techniques (antibiotic inhibition and isotope site preference) used to  
96 estimate fungal and bacterial contributions to N<sub>2</sub>O emissions are biased and often lack  
97 corroborating evidence in conjunction with their application, suggesting fungal contributions to  
98 N<sub>2</sub>O emissions are substantially inflated (5, 25–27). For example, antibiotics are often criticized  
99 for lacking both generality and specificity, but the expected biases resulting from the exclusive  
100 use of antibiotic inhibition techniques to assess fungal contributions to N<sub>2</sub>O emissions remain  
101 unaccounted for. Bias could be interpreted by concurrently employing culture-independent  
102 techniques (i.e., multi-omics approaches); however, these practices are lacking in investigations  
103 of fungal denitrification, and the singular use of antibiotics to partition microbial activity casts

104 doubt on the quantitative value of observations derived from this approach regarding fungal  
105 denitrification (25, 26).

106         The capacity for N<sub>2</sub>O-production conferred by *p450nor* in fungi is a uniquely eukaryotic  
107 trait, yet previous investigations have hypothesized an actinobacterial origin for *p450nor* based  
108 on sequence comparisons (7, 28–30). Of note, *Actinobacteria* are not considered canonical  
109 denitrifying bacteria, and only a few reports of their denitrification capacity exist (31–33). Most  
110 members of the *Actinobacteria* possess a truncated denitrification pathway or lack a canonical  
111 nitric oxide reductase gene (*nor*) (with the exception of *Corynebacterium* and  
112 *Propionibacterium*) (32, 33). Hence, members of the Fungi and *Actinobacteria* share an  
113 incomplete denitrification pathway with a potentially limited capacity to perform denitrification.  
114 Consistent with the horizontal gene transfer (HGT) hypothesis are sequence similarities between  
115 fungal P450nor and actinobacterial P450s of the CYP105 family, many of which have been  
116 investigated for their contributions to secondary metabolism (SM) (7, 34). Despite these  
117 observations, the prevailing hypothesis regarding *p450nor*'s evolution and function was its  
118 acquisition from the *Actinobacteria* and subsequent evolution to fill a novel role in  
119 denitrification, specifically the reduction of NO to N<sub>2</sub>O (7, 29). The hypothesis that *p450nor* was  
120 acquired from one or more members of the *Actinobacteria* and retained an ancestral function in  
121 SM surprisingly remains unexplored.

122         Efforts associated with the 1,000 Fungal Genomes and Assembling the Fungal Tree of  
123 Life (AFTOL) projects have resulted in a steady rise in genomic sequence data for members of  
124 the fungal kingdom (35, 36). These large scale sequencing efforts facilitate comprehensive  
125 phylogenomic investigations with the potential to uncover the causes and consequences of the  
126 genomic architecture of fungi and assist in directing research efforts. Hence, the overarching

127 questions this study addresses are I) what is the breadth of denitrification genes across fungal  
128 genomes and what are their evolutionary relationships, and II) can phylogenomic analyses  
129 reconcile the conflict in fungal contributions to N<sub>2</sub>O formation observed in laboratory and  
130 environmental settings? Our comparative genomic and phylogenetic analyses identified a  
131 disconnect between *p450nor* and denitrification gene presence and supported a role for P450nor  
132 in SM rather than denitrification. Importantly, these results provide an explanation for the minor,  
133 non-respiratory capacity of fungi to form N<sub>2</sub>O, and suggests N<sub>2</sub>O is a byproduct of active SM.  
134 These findings transform our understanding of the ecological significance and environmental  
135 consequences of *p450nor* presence/absence in fungal genomes.

136

## 137 **Results**

### 138 **Infrequent co-occurrence among denitrification genes in fungi**

139 Bioinformatic analyses identified homologs of canonical bacterial and fungal denitrification  
140 genes (*narG*, *napA*, *norB*, *nirK*, *nosZ*, *p450nor*) in 712 fungal genomes. Of the denitrification  
141 gene set investigated, only *narG*, *napA*, *nirK*, and *p450nor* were detected (Fig. 1). Genes  
142 encoding the membrane bound respiratory nitrate reductase (*narG*) were detected in only three  
143 fungal genomes (0.42 %) and were excluded from further analysis due to their low occurrence.  
144 The genes predicted to encode the periplasmic nitrate reductase (NapA) and the copper-  
145 containing nitrite reductase (NirK) were detected in 75 (10.5 %) and 82 (11.5 %) of the 712  
146 fungal genomes analyzed, respectively (Fig. 1, Table S1). In contrast, P450nor gene sequences  
147 occurred at approximately twice the frequency in 167 (23 %) of the fungal genomes analyzed,  
148 supporting the claim that P450nor-mediated N<sub>2</sub>O production may be widespread in fungi (Fig. 1)  
149 (37). A breakdown of genus- and family-level denitrification gene abundances in fungal

150 genomes underscores the disparity in presence/absence of denitrification genes in fungi and is  
151 available in Supplemental Information (SI) (Dataset S1, Fig. S1).

152 Our analyses also revealed a low co-occurrence between *p450nor* and additional fungal  
153 denitrification pathway markers. Since *p450nor* is regarded as the sole trait encoding N<sub>2</sub>O  
154 production in fungi, the co-occurrence of multiple denitrification gene markers would be  
155 indicative of a capacity for sequential respiratory denitrification, whereas isolated occurrences  
156 could be indicative of alternative processes such as detoxification. The three-gene set  
157 *narG/nirK/p450nor* did not co-occur in any of the fungal genomes examined, whereas co-  
158 occurrence of the gene set *napA/nirK/p450nor* was observed in 18 (10.8 %) of 167 *p450nor*-  
159 containing fungal genomes. Sets of at least two co-occurring denitrification traits (i.e.,  
160 *narG/p450nor*, *napA/p450nor*, and *nirK/p450nor*) were found in 0, 18 and 29 % of fungal  
161 genomes, respectively. Of the *napA*-containing fungal genomes, 25 (33 %) also contained a *nirK*  
162 gene, whereas 30 % of the *nirK*-containing fungal genomes also harbored a *napA* gene.

163 Evolutionary correlation was strongly supported for the gene sets *napA/nirK*, *napA/p450nor*, and  
164 *nirK/p450nor*, with average log Bayes Factor values of  $31.9 \pm 0.60$ ,  $12.2 \pm 0.11$ , and  $31.3 \pm 0.04$ ,  
165 respectively. Hence, the genes *napA*, *nirK*, and *p450nor* occur in related fungal taxa, but co-  
166 occurrences were infrequent within the individual fungal genomes analyzed.

### 167 **Evolutionary forces acting upon denitrification traits within fungi**

168 To identify evolutionary forces shaping the observed distribution of denitrification traits within  
169 fungi, comparisons between gene and species trees were assessed with phylogenetic tests and  
170 parsimony-informed models to quantify evolutionary events. Visual inspection of *p450nor* gene  
171 and species trees indicated potential widespread HGT of *p450nor* within fungi, examples of  
172 which included HGT of *p450nor* from the phylum Ascomycota to members of the

173 Basidiomycota and within and among classes of ascomycetes (Fig. S2). Furthermore, the  
174 monophyly of five fungal classes containing *p450nor* (Dothideomycetes, Eurotiomycetes,  
175 Leotiomycetes, Sordariomycetes, and Tremellomycetes) were not supported by approximately  
176 unbiased (AU) tests ( $p \leq 0.05$ , Table S2), indicative of dynamic evolution of *p450nor* in most  
177 fungal lineages. Although co-phylogeny plots are suggestive of HGT, additional analysis using  
178 NOTUNG software was performed to model potential gene duplication (GD), gene transfer  
179 (GT), and gene loss (GL) events (38). Of the *napA*, *nirK*, and *p450nor* genes analyzed, the  
180 *p450nor* phylogenies had the greatest number of predicted GT events, ranging from 4 to 15 GT  
181 events despite applying stringent GT costs within NOTUNG software (Table S3). At GT costs  
182 below 9, no temporally consistent optimal solutions were reached, suggesting that GD and GL  
183 alone are insufficient to describe the evolutionary dynamics of *p450nor* in fungi. Using the same  
184 stringent GT costs, the predicted number of GT events detected for *napA* and *nirK* were much  
185 lower, and ranged from 1 to 3 and 0 to 1 GT events for each gene, respectively (Table S3). The  
186 reduced number of GT events detected in *napA* and *nirK* phylogenies were also apparent from  
187 co-phylogeny plots of each gene (Fig. S3, S4) compared to co-phylogenetic plots for *p450nor*  
188 (Fig. S2). Although GT events detected for *napA* were lower than *p450nor* at high GT costs, GT  
189 may still represent a significant evolutionary force contributing to the observed *napA* distribution  
190 in extant fungal lineages (Table S3). For example, AU tests rejected the monophyly of three  
191 Ascomycota (Dothideomycetes, Leotiomycetes, and Sordariomycetes) and one Basidiomycota  
192 (Pucciniomycetes) lineage within the *napA* phylogeny (Table S2,  $P \leq 0.05$ ). Specific instances of  
193 predicted HGT events are outlined in Supplemental Information (SI) for each gene (Table S4,  
194 Fig. S5).

195 **Fungal P450nor evolved from actinobacterial P450s involved in SM**



196 Previous investigations have hypothesized an actinobacterial origin for *p450nor* based on amino  
197 acid sequence alignments (7, 28, 30), but rigorous phylogenetic tests of *p450nor*'s origins were  
198 lacking to support this hypothesis. Alignment of fungal P450nor amino acid sequences to the  
199 NCBI RefSeq protein database identified 230 bacterial sequences with significant sequence  
200 alignment ( $\geq 65\%$  query coverage,  $\geq 35\%$  amino acid identity) to P450nor. Of note, *p450nor*  
201 homologs were also detected within the genomes of three freshwater inhabiting green algae,  
202 *Chlorella variabilis*, *Chlamydomonas reinhardtii*, and *Monoraphidium neglectum*, expanding the  
203 known distribution of *p450nor* to photosynthetic eukaryotic microbes. Additional *p450nor*  
204 homologs were not detected in archaea, plant, protist, or other lineages housed within the RefSeq  
205 database. Of the bacterial cytochrome P450 (hereafter P450) sequences identified, approximately  
206 6% ( $n = 13$ ) were proteobacterial in origin, whereas the remaining sequences belonged to  
207 members of the bacterial phylum *Actinobacteria* (Fig. S6). Ancestral character state  
208 reconstruction of select P450 families on a subset of these sequences supported the monophyly  
209 of *p450nor* and bacterial P450 gene sequences of the P450 family CYP105 (Fig. 2) (39). The  
210 same relationships were preserved when phylogenetic reconstruction was performed using the  
211 complete set of 408 P450 amino acid sequences (Fig. S7). Importantly, NO-utilizing P450  
212 sequences from the CYP107 family belonging to members of the *Streptomyces* formed a larger  
213 monophyletic clade containing P450nor and other CYP105 sequences (Fig S7). The CYP107  
214 family includes *txtE* genes encoding nitrating enzymes that use NO as a substrate for the  
215 production of secondary metabolites and have no known role in respiratory denitrification or  
216 detoxification (40, 41). Thus, P450nor and TxtE are related (40, 41), yet TxtE is involved in SM  
217 and is the only other P450 observed to directly utilize NO as a substrate.

218 Sequences of the bacterial CYP105 family of P450s include diverse actinobacterial  
219 genera such as *Streptomyces* (n = 159), *Amycolatopsis* (n = 12), *Saccharothrix* (n = 5),  
220 *Streptacidiphilus* (n = 4), *Frankia* (n = 4), *Kutzneria* (n = 4), *Nocardia* (n = 3), and members  
221 from 17 additional actinobacterial genera (n = 39). The proteobacterial sequences were affiliated  
222 with members of the genera *Burkholderia* (n = 5), *Paracoccus* (n = 3), *Bradyrhizobium* (n=3),  
223 *Pseudomonas* (n = 1), and *Halomonas* (n = 1). Bacterial P450 gene and species tree comparisons  
224 of 60% identity clustered P450 amino acid sequences (n = 57) and cognate 16S rRNA genes (n =  
225 55) supported HGT of one or more actinobacterial P450 genes to members of the *Alpha*-, *Beta*-,  
226 and *Gammaproteobacteria* (Fig. S6). Furthermore, ancestral character state reconstruction  
227 overwhelmingly supported *Actinobacteria* as the root state (root probability =  $0.99 \pm 0.06$ ) of the  
228 bacterial CYP105 family P450 phylogeny. When forcing the root state of the P450 phylogeny to  
229 be *Proteobacteria* (simple model) and comparing to the complex model where the root is  
230 allowed to vary, the simple model with a proteobacterial root was not supported (average log  
231 Bayes Factor =  $0.03 \pm 0.18$ ). Therefore, *p450nor* likely evolved from one or more CYP105  
232 family P450 genes found in members of the *Actinobacteria*. This finding underscores *p450nor*'s  
233 distinct origin compared to the fungal denitrification traits *napA* and *nirK*, which have a distinct  
234 proteobacterial ancestry consistent with the majority of bacterial denitrifiers (Fig. S8).

### 235 **Widespread co-occurrence of *p450nor* and NO-detoxifying flavohemoglobins**

236 Poor conversion of inorganic N-oxides to N<sub>2</sub>O by fungal isolates supports the hypothesis that  
237 P450nor is involved in NO detoxification (7, 42). However, fungi also possess NO-detoxifying  
238 flavohemoglobins responsible for detoxification of NO to NO<sub>3</sub><sup>-</sup> under oxic conditions or NO to  
239 N<sub>2</sub>O under anoxic conditions (42–44). Flavohemoglobins were detected in 450 (63 %) fungal  
240 genomes investigated and were widespread within ascomycete and basidiomycete fungi. Within

241 *p450nor*-containing genomes, 125 (75 %) also possessed a flavohemoglobin gene (Fig. 1, Table  
242 S1). The number of genomes in fungal families containing *p450nor* and NO-detoxifying  
243 flavohemoglobin genes were significantly correlated (Spearman  $r = 0.87$ ,  $p = 1.6e^{-10}$ ), and  
244 suggests *p450nor*'s primary function is not NO detoxification.

#### 245 **Evidence of a role for *p450nor* in secondary metabolism**

246 *p450nor* is actinobacterial in origin, yet *Actinobacteria* are not considered canonical denitrifiers  
247 and evidence for their role in denitrification was lacking when *p450nor* was initially identified  
248 (29, 45). Subsequent investigations did not posit a role for *p450nor* in SM despite the affiliation  
249 of *p450nor* and CYP105 P450s with documented roles in SM (34, 46). To assess genomic  
250 evidence linking *p450nor* to SM, we queried genes encoded within genomic regions  
251 approximately 50 kb on either side of *p450nor* for functions related to SM. The biosynthetic  
252 gene cluster (BGC) prediction tool antiSMASH detected putative BGCs containing *p450nor* in  
253 19 (11 %) of the 167 *p450nor*-containing genomes analyzed (Dataset S2). The number of open  
254 reading frames in a predicted SM cluster ranged from 34 to 97, spanning 21,086 to 55,473  
255 nucleotides in length. Inspection of protein-coding genes surrounding *p450nor* using curated  
256 antiSMASH profile Hidden Markov Models (pHHMs) resulted in the identification of hallmark  
257 SM features (e.g., polyketide synthases (PKS), non-ribosomal peptide synthases (NRPS), terpene  
258 cyclases, dimethylallyl tryptophan synthases) in an additional 40 (24 %) of the 167 *p450nor*-  
259 containing genomes analyzed (Dataset S2) (see Materials and Methods for details). The  
260 distribution of automatic and manually curated protein-coding genes surrounding a subset of 32  
261 *p450nor*-containing fungi suggests that *p450nor*-containing BGCs are structurally and  
262 functionally diverse (Fig. 3). An additional BGC prediction tool, CASSIS, which detects BGCs  
263 based on shared transcription factor binding sites upstream and downstream of a user specified

264 anchor gene (47), predicted as many as 105 (63 %) *p450nor*-containing gene regions to be BGCs  
265 (Dataset S3). Furthermore, CASSIS analysis corroborated 74 % of the 19 BGCs predicted by  
266 antiSMASH (Dataset S3). A detailed accounting of antiSMASH and CASSIS predictions, gene  
267 annotations, and gene organization surrounding *p450nor* in all 167 *p450nor*-containing genomes  
268 is available in the SI (Fig. S9, Dataset S2).

269 A diversity of secondary metabolite biosynthesis pathways were predicted to be encoded  
270 by *p450nor*-containing BGCs, including nonribosomal peptides (n = 7), polyketides (n = 5),  
271 terpenes (n = 2), hybrid terpene-polyketide-indoles (n = 2), indoles (n = 1), or currently  
272 unclassifiable compounds (n = 2). Phylogenetic reconstruction of C-type and ketosynthase  
273 domains encoded by NRPS and PKS genes surrounding *p450nor* enabled the prediction of  
274 potential secondary metabolites encoded by fungal *p450nor*-containing BGCs (Fig. 4). For  
275 example, domains from NRPS and PKS sequences encoded nearby *p450nor* are affiliated with  
276 reference NRPS and PKS sequences known to produce cyclic tetrapeptides (HC-toxins) (n=7),  
277 aflatoxins (n=5), fumonisins (n=4), calcium-dependent antibiotics (n=1), and statins (n=1),  
278 suggesting a large variety of secondary metabolites are encoded by gene regions containing  
279 *p450nor*.

280 The formation of N<sub>2</sub>O has previously been reported as highly variable among closely  
281 related fungi (37, 48), yet evidence suggesting a role for *p450nor* in this phenomenon is lacking.  
282 Of the 94 fungal genera harboring *p450nor*, 21 (22 %) contained species with and without a copy  
283 of *p450nor* (Table S5). For example, 15 out of 16 (94 %) *Pseudogymnoascus* genomes contained  
284 *p450nor*, whereas only 1 out of 7 (14 %) *Exophiala* genomes contained a *p450nor* gene.  
285 Nucleotide alignments of *p450nor*-containing genomic regions (81.3 ± 27.8 kb in length) against  
286 other fungal genomes revealed a disproportionately high nucleotide identity and alignment

287 length between genomes with and without *p450nor* from the same genus (Fig. 5A-C). For  
288 example, genomic regions surrounding *p450nor* in *Exophiala xenobiotica* are highly similar to  
289 other *Exophiala* species without *p450nor* (Fig. 5D), and additional examples of large, high  
290 identity regions between closely related fungal genomes with and without *p450nor* are abundant  
291 (Fig. 5A-C, Dataset S4).

292

## 293 **Discussion**

### 294 **An evaluation of hypotheses regarding the biological role of *p450nor***

295 The three leading hypotheses regarding the biological role of fungal *p450nor* are respiratory  
296 denitrification (7), NO detoxification (42), and now secondary metabolism. The respiratory  
297 denitrification hypothesis is dubious since evidence is lacking to classify fungi as respiratory  
298 denitrifiers (4, 17–19, 49). Furthermore, unaccounted for methodological biases inherent to  
299 partitioning techniques raises substantial concerns over the validity of fungal N<sub>2</sub>O production *in*  
300 *situ* (4, 25–27). The ineffectiveness of antibiotics to partition microbial respiration has been  
301 previously demonstrated (25, 26), yet antibiotics continue to be used to support the prevalence of  
302 fungal respiratory denitrification. In addition to antibiotic inhibition, site preference  
303 measurements of the intramolecular distribution of <sup>15</sup>N within the linear N<sub>2</sub>O molecule (i.e., N<sub>2</sub>O  
304 isotopocules) of cultured microorganisms have been increasingly applied to partition microbial  
305 sources of N<sub>2</sub>O *in situ* (5, 50). Although promising, the limitations of N<sub>2</sub>O isotopocule  
306 measurements used in isolation are becoming apparent (27, 51, 52). Of primary concern is the  
307 significant overlap in, and difficulty discretizing, site preference measurements of distinct  
308 processes or diverse microbial assemblages (51, 53, 54). Therefore, the respiratory denitrification

309 hypothesis is predicated on biased approaches used in isolation that are unable to correctly assess  
310 fungal contributions to denitrification.

311 Another alternative function suggested for P450nor is NO detoxification, which was  
312 initially postulated in experiments using the fungus *Fusarium oxysporum* strain 11n1 (55). This  
313 hypothesis was supported by low growth yields and a poor mass balance between the N-  
314 oxyanion inputs and N<sub>2</sub>O formed (18, 56, 57). Although plausible, the NO detoxification  
315 hypothesis is confounded by extensive co-occurrence between *p450nor* and genes encoding  
316 canonical NO-detoxifying flavohemoglobins, which also produce N<sub>2</sub>O (44, 58) (Fig. 1, Table  
317 S1). Considering the extensive overlap in *p450nor* and flavohemoglobin gene presence (Fig.1),  
318 the utility of site preference values derived from N<sub>2</sub>O formed by fungi in pure culture is  
319 questionable. Furthermore, P450nor and flavohemoglobins would likely compete for NO under  
320 anoxic conditions, and experiments teasing apart their contributions to N<sub>2</sub>O formation are  
321 necessary to support the postulated role of P450nor in NO detoxification. The reported Michaelis  
322 constant (K<sub>m</sub>) of NO binding to P450nor ranges from 0.1 to 0.6 mM (11, 12) and is orders of  
323 magnitude higher than the 0.1 to 0.25 μM K<sub>m</sub> reported for flavohemoglobins (59), suggesting  
324 flavohemoglobin would outcompete P450nor for NO binding. Hence, the higher affinity of  
325 flavohemoglobins for NO and their greater distribution in fungi would suggest a limited role for  
326 P450nor in NO detoxification (Table S1). Though fungi certainly detoxify NO, insufficient  
327 evidence exists to attribute this activity to P450nor.

328 The SM hypothesis has traction considering that P450nor is derived from CYP105 P450s  
329 (Fig. 2), all of which share a functional role in SM (34, 46, 60). Thus, the adaptation of P450nor  
330 to a novel niche in NO reduction and denitrification is unlikely. A more parsimonious hypothesis  
331 is that P450nor has maintained a role in SM as observed for related actinobacterial enzymes.

332 When *p450nor* was originally described, members of the *Actinobacteria* (e.g., *Streptomyces*)  
333 were already well established secondary metabolite producers and their N<sub>2</sub>O production was  
334 attributed to detoxification (45, 61). The monophyly of P450nor with the SM enzyme TxtE, the  
335 only other NO-utilizing P450, provides additional *a priori* support for P450nor's role in SM (Fig.  
336 S7). P450nor's role in SM is further corroborated by SM prediction tools where a sizeable  
337 proportion (35 %) of gene regions surrounding *p450nor* contained genes predicted to encode  
338 hallmark SM functions, and as many as 105 (63 %) *p450nor*-containing genomic regions were  
339 automatically predicted to be involved in SM (Fig. 3). Moreover, the fact that antiSMASH  
340 flagged 11% of *p450nor*-containing genomic regions as putative BGCs suggests their  
341 organization and gene content is highly similar to other characterized BGCs. Although  
342 phylogenomic evidence supports a role for P450nor in the biosynthesis of secondary metabolites,  
343 direct physiological evidence should be a target for future research efforts. Emerging  
344 technologies enabling the expression of full length BGCs and metabolite identification should  
345 enable robust experimentation to test the SM hypothesis (62). Regardless, *p450nor*-containing  
346 genomic regions were predicted to be BGCs encoding diverse metabolites including terpenoids,  
347 nonribosomal peptides, polyketides, indoles, and other complex metabolites (Fig. 4) consistent  
348 with its evolutionary origins (Fig. 2).

#### 349 **Predicting P450nor's role in secondary metabolism**

350 A variety of metabolites containing nitro functional groups have been detected in fungal genera  
351 known to harbor denitrifying representatives (63), yet mechanistic explanations for nitration  
352 reactions in fungi remain elusive. The addition of a nitro functional group to a metabolite  
353 represents a potential mechanism for enhancing its toxicity or functional specificity (64). The  
354 hypothesis of a role for P450nor in nitration, or possibly nitrosylation, of fungal metabolites is

355 attractive given P450nor's affiliation with the nitrating enzyme TxtE. The inclusion of *p450nor*  
356 within BGCs may be adaptive in fungal lineages in which this gene was acquired due to the  
357 augmenting effects that nitro or nitroso groups impart on their substrates (64). Support for this  
358 hypothesis stems from the widespread distribution of *p450nor* within secondary metabolite  
359 producing members of the Ascomycota (65, 66), and previous reports of HGT between members  
360 of *Actinobacteria* and fungi in enhancing fungal SM (67). Furthermore, the high nucleotide  
361 identity shared between *p450nor*-containing genomic regions from closely related fungal species  
362 suggests *p450nor* gain or loss may have important consequences for the secondary metabolites  
363 potentially produced by *p450nor*-containing BGCs (Fig. 5D). Considering that 22 *p450nor*  
364 containing fungal genera display variability in *p450nor* presence/absence (Table S5),  
365 investigations regarding the impact of *p450nor* presence/absence on the secondary metabolite  
366 pool, fungal fitness, competition, or infectivity within closely related fungi is readily testable.

367 Additional unknowns related to P450nor's role in SM are the identification of putative  
368 substrates and sources of NO required to fuel the hypothesized nitration or nitrosylation  
369 reactions. To date, P450nor is solely reported to bind the electron donors NADH or NADPH and  
370 the electron acceptor NO (7). However, N<sub>2</sub>O formation by P450nor is oxygen dependent (8, 22),  
371 suggesting O<sub>2</sub> may be an additional substrate as observed for TxtE (40). TxtE and NovI, both  
372 P450s affiliated with P450nor, bind to and transform L-tryptophan and L-tyrosine to produce the  
373 secondary metabolites thaxtomin A and novobiocin, respectively (40, 68). It is conceivable that  
374 P450nor might also bind O<sub>2</sub> and aromatic amino acids, but direct experimental evidence is  
375 required to support this hypothesis. A potential source of NO in fungi could result from nitrite  
376 reductase activity of the copper containing nitrite reductase, NirK. The NO synthase (TxtD) from  
377 *Streptomyces turgidiscabies* produces NO to fuel TxtE nitration of L-tryptophan (40), but *txtD*



378 homologs were not detected in the fungal genomes examined. Although evidence of NO  
379 synthases in fungi exist, knowledge regarding their distribution is limited (69, 70). Given the  
380 functional redundancy between NO synthases and NirK, it is conceivable that one of NirK's  
381 functions in fungi is to generate NO for use by P450nor in SM.

### 382 **Causes and consequences of *p450nor* evolution in fungi**

383 A limited understanding of *p450nor* evolution represented an impediment to our knowledge of  
384 fungal N<sub>2</sub>O formation. For example, closely related fungi vary in their ability to produce N<sub>2</sub>O  
385 (16, 37, 48, 56), and the evolutionary forces (e.g., HGT, gene gain/loss, and incomplete lineage  
386 sorting) contributing to this observation were unexplored. For *p450nor*, many HGT events were  
387 observed between distantly related fungal lineages using gene and species tree comparisons (Fig.  
388 S2). Although HGT events are challenging to precisely quantify given the level of uncertainty in  
389 deeply branching nodes of the functional gene trees reported here, a signal of potentially double  
390 digit HGT events were observed using gene tree-species tree reconciliation (Table S3).  
391 Moreover, genetic elements encoding *pogo* family transposases (N = 9), retrotransposons (N =  
392 4), and reverse transcriptases (N = 1) were in some cases detected adjacent to *p450nor* and may  
393 act as vehicles for dissemination of *p450nor* within fungi and between fungal chromosomes  
394 (Dataset S2).

395 N<sub>2</sub>O production was previously coined a widespread trait in fungi (37), yet genomic  
396 analysis suggests fortuitous N<sub>2</sub>O formation by fungi is largely restricted to members of the  
397 Ascomycota. For example, of the 167 *p450nor*-containing fungal genomes identified, 163 were  
398 affiliated with members of the Ascomycota and only four with members of the Basidiomycota.  
399 N<sub>2</sub>O production has been reported for fungal isolates assigned to the recently revised phylum  
400 Mucoromycota (4, 71), yet no evidence of genes underlying denitrification were detected in

401 available genomes from members of this phylum (Fig. 1). Denitrification markers were also  
402 absent from ascomycete yeast genomes (i.e., *Candida*, *Yarrowia*), though a number of N<sub>2</sub>O-  
403 producing ascomycete yeasts have been reported (56). Even within the Basidiomycota, N<sub>2</sub>O  
404 formation is restricted to a few taxa within the Tremellomycetes and Agaricomycetes (4), and at  
405 least for members of the Tremellomycetes, was likely the result of HGT from one or more  
406 members of the Ascomycota (Fig S2). The finding that genomes from fungi (e.g., ascomycete  
407 yeasts) previously observed to produce N<sub>2</sub>O did not possess denitrification traits was unexpected  
408 and suggests that experimental artifacts or other mechanisms, such as the NO-detoxifying  
409 activity of flavohemoglobins, may also contribute to N<sub>2</sub>O formation in fungi. In addition to  
410 fungi, species of green algae have been reported to produce small quantities of N<sub>2</sub>O, the  
411 production of which could, at least in part, be attributed to the presence of *p450nor* within this  
412 lineage (72–74). Despite these findings, green algae lack a mass balance between the inorganic N  
413 added and the N<sub>2</sub>O formed (74) and display low rates and quantities of N<sub>2</sub>O production on par  
414 with fungi (72), suggesting that N<sub>2</sub>O formation is not a respiratory process in these organisms.  
415 Considering the lack of evidence of respiratory denitrification in green algae and genomic  
416 evidence linking *p450nor* to SM in fungi, the SM hypothesis is an attractive explanation for the  
417 presence of *p450nor* in green algae as well.

418 *p450nor* genes within fungi also have implications for fungal pathogenesis (4). At least  
419 for some bacteria (e.g., *Neisseria*, *Brucella*, *Mycobacterium*), the presence of denitrification  
420 genes has been demonstrated to enhance virulence or detoxification of N-oxides produced by the  
421 host (75). Although the impact of denitrification gene acquisition on fungal pathogenesis is not  
422 well established, there is growing evidence for *p450nor* involvement in fungal virulence (4, 7).  
423 For example, *p450nor* gene expression is linked to *Fusarium* wilt in banana and cotton plants,

424 yet mechanistic explanations of P450nor's function during plant infection are lacking (76, 77).  
425 Notably, more than half of all *p450nor*-containing fungal species are known plant pathogens (4),  
426 and the involvement of *p450nor* in SM is consistent with and would support the plant pathogenic  
427 life history strategies of many *p450nor*-containing fungi.

428         The diversity of denitrifying microorganisms and the modularity of the pathway has led  
429 to the view of denitrification as a community function (78–80). Therefore, limited co-occurrence  
430 and correlated evolution between *napA*, *nirK*, and *p450nor* might suggest mutualistic  
431 interactions occur between fungal or bacterial species performing denitrification. However, gene  
432 co-occurrences and evolutionary correlations should be interpreted with caution as additional  
433 factors (e.g., shared ecological niche, selection pressures) related to fungal life history strategies  
434 may explain their distribution equally well. For example, N<sub>2</sub>O-producing fungi are frequently  
435 detected in, and cultivated from, highly disturbed, N-amended agricultural soils (4, 9, 16) and  
436 detoxification or N-oxide utilization traits may merely co-occur more frequently due to selection  
437 imposed by episodic N addition. Fungi also contain genes homologous to bacterial denitrifiers,  
438 but their presence does not guarantee a role in respiratory denitrification. For example, the  
439 presence of genes homologous to the bacterial NO reductase (*norB*) is not sufficient evidence for  
440 respiratory denitrification potential in bacteria (17, 75). The same is true of the abundant *napA*  
441 gene homologs detected in fungal genomes, which would suggest a robust capacity of fungi to  
442 perform dissimilatory nitrate reduction. Yet this is not the case, and many fungi only produce  
443 N<sub>2</sub>O when NO<sub>2</sub><sup>-</sup> is present (4, 18, 56).

444         In summary, fungi often produce little or no gaseous N from reduction of N-oxyanions  
445 and do not grow proportionally to the quantity of N-oxyanions consumed; thus, fungi cannot be  
446 classified as respiratory denitrifiers (17). Given the limited accounting of methodological bias in

447 the study of N<sub>2</sub>O production by fungi (25–27), alternative explanations for the biological  
448 function of *p450nor* in fungi are likely and raises concerns over the validity of these techniques  
449 in estimating fungal contributions to N<sub>2</sub>O emissions. Although the P450nor NO detoxification  
450 hypothesis is plausible, available data are insufficient at present to definitively support a role for  
451 P450nor in this process. Considering that many canonical denitrifying fungi are also plant  
452 disease causing secondary metabolite producers and agricultural pests, the affiliation of *p450nor*  
453 with non-denitrifying actinobacterial sequences involved in SM and their inclusion in BGCs  
454 strongly endorses a biological role for *p450nor* in SM.

## 455 **Materials and Methods**

### 456 *Datasets*

457 Draft and complete fungal, algal, and bacterial genomes were accessed from the National Center  
458 for Biotechnology Information and the Joint Genome Institute on March 16<sup>th</sup>, 2016 and  
459 downloaded from their respective database utilities. A list of fungal, algal, and bacterial genomes  
460 and their taxonomic and database affiliations can be found in the Supplemental Information (SI)  
461 (Dataset S5).

### 462 *Gene marker identification*

463 To identify gene markers within fungal genomes suitable for phylogenetic analysis, a database of  
464 1,438 amino acid sequences of fungal single copy orthologs from the BUSCO tool v1.1b (81)  
465 were provided as queries to the genblastG search tool v1.0.138 (82). The genblastG tool  
466 performs amino acid alignment of protein queries against a six frame translated nucleotide  
467 subject sequence (genome) to find significant alignments and uses heuristic analysis to piece the  
468 appropriate gene models back together from high-scoring segment pairs identified using BLAST  
469 (83). Of the BUSCO gene models queried, 238 were used for phylogenetic tree reconstruction

470 and were annotated using PfamScan against the Pfam A database and blastp against the uniprot  
471 database with default settings (84–87) (Dataset S6). The genblastG tool was also used to detect  
472 gene sequences involved in denitrification (NapA, NarG, NirK/NirS, NorB, P450nor, NosZ)  
473 from curated bacterial proteins in the FunGene repository (88) or proteins involved in NO  
474 detoxification (flavoheмоglobins) identified in the literature (44). Denitrification gene models  
475 used in downstream phylogenetic analysis were manually curated against full length fungal  
476 reference sequences to ensure that accurate gene models were predicted for each organism in  
477 which the gene was detected. After identification of these genes in fungal genomes, alignment of  
478 the fungal NapA, NirK, NarG, and P450nor amino acid sequences with blastp against the plant,  
479 archaea, bacteria, protozoa, and fungi RefSeq protein databases (89) was performed to identify  
480 similar sequences in each taxonomic group. Protein sequences demonstrating significant  
481 alignment ( $\geq 60\%$  query coverage and  $\geq 35\%$  amino acid identity) to fungal proteins were used  
482 in subsequent phylogenetic reconstructions.

#### 483 *Gene prediction for comparative genomic analyses*

484 The *ab initio* gene predictor SNAP (90) was used to predict gene models in fungal genomes  
485 where no such information was available (e.g., some draft genomes). In this case, one or several  
486 closely related fungal genomes containing gene models were selected based on phylogenetic  
487 affiliation to train SNAP for gene prediction. Although this methodology is limiting when  
488 closely related genomes are unavailable, gene models from close relatives were available for  
489 *p450nor*-containing genomes lacking gene predictions.

#### 490 *Alien index calculations*

491 The alien index (AI) was calculated as previously described and modified for use with a single  
492 gene (44). Briefly, pairwise amino acid sequence alignments were performed using blastp for

493 fungal NapA, NirK, and P450nor sequences. The in group was defined as the aligned sequence  
494 with the highest bitscore (excluding the query) belonging to the same taxonomic class as the  
495 query sequence. Accordingly, the out group was defined as the aligned sequence with the highest  
496 bitscore not belonging to the same taxonomic class as the query. The maximum bitscore was the  
497 bitscore derived from the alignment of the query to itself. Therefore, AI is calculated as follows:

$$498 \quad AI = (out\ group\ bitscore / \max\ bitscore) - (in\ group\ bitscore / \max\ bitscore)$$

499 AI values range from 1 to -1. Values greater than zero are indicative of HGT or contamination of  
500 foreign DNA within the genome sequence being queried.

#### 501 *Analysis of SM gene clusters in fungi*

502 Genomic regions 50 kb up- and downstream of a *p450nor* gene in each genome were subjected  
503 to gene cluster prediction with the antiSMASH and CASSIS tools with default settings (47, 91).  
504 Additionally, genes encoded +/- 10 genes up and downstream of *p450nor* were evaluated using  
505 PfamScan searches with default settings against the pHHMs of curated SM genes identified by  
506 antiSMASH (Dataset S2) (91). Protein sequences with significant alignment to antiSMASH  
507 pHHMs were given an “automatic” SM function status and were colored blue. In order to  
508 supplement the automated SM annotation, additional functional annotation was performed by  
509 hmmscan searches with HMMER3 (92) against the eggNOG database (93). These functional  
510 annotations were manually flagged as related to SM if they possessed literature entries  
511 suggesting an involvement in SM or had functions related to methyl transfer, oxidation-reduction  
512 reactions, glycosyl transferases, fungal specific transcription factors, and other protein functions  
513 that may be important for SM outlined by antiSMASH (91). All manual SM annotations were  
514 colored light blue to indicate potential involvement in SM. All other annotations were colored  
515 grey when no evidence connecting the function to SM could be identified.

516 Additionally, ortholog clustering of protein-coding genes surrounding *p450nor* was  
517 performed using OrthoFinder (94) with default settings. Ortholog clustering was performed using  
518 only a representative *p450nor* loci in each fungal genome if multiple gene copies were present. A  
519 Shannon-like diversity index of fungal classes detected in each orthologous group was calculated  
520 as  $H' = -\sum(P_i * \ln(P_i))$ , where  $P_i$  is the fraction of fungal class  $i$  present in an orthologous  
521 group. Pairwise nucleotide alignments of *p450nor*-containing genomic regions were performed  
522 as previously described (95). Briefly, the *nucmer* utility of MUMmer v3.0 (96) was used to align  
523 *p450nor*-containing genomic regions (~100 kb) against whole genomes of fungi with and  
524 without *p450nor*. The average nucleotide identity (reported as ANIm) of the alignment was  
525 calculated from the resulting delta output file. The resulting data was plotted using Matplotlib  
526 (97) available for the python programming language (<http://www.python.org>).

#### 527 *Phylogenetic analysis*

528 Phylogenetic reconstruction of the fungal species tree was performed using concatenated amino  
529 acid sequences from 238 single copy orthologs found in  $\geq 90$  % of all genomes (Dataset S6). The  
530 genomes of *Puccinia arachidis* and *Microbotryum lychnidis-dioicae* strain p1A1 Lamole were  
531 excluded from further analysis due to an insufficient number of informative sites and  
532 inconsistent placement within the fungal tree. Alignment of amino acid sequences were  
533 performed individually on all 238 individual BUSCO gene models present within each organism  
534 using MAFFT v7.130b (98) with linsi alignment tuning parameters (--maxiterate 1000 and --  
535 localpair settings used). Individual alignments were concatenated using in-house python scripts,  
536 resulting in a 65,897 column alignment. Tree reconstruction was performed using FastTree2 (99)  
537 with refined tree reconstruction settings for slower, more exhaustive search of the tree space than  
538 default settings (-bionj -slow -gamma -spr 4 -lg -mlacc 2 and -slownni settings). For comparison

539 to tree reconstruction using a concatenated alignment, individual trees from each BUSCO  
540 alignment were also constructed using FastTree2 with identical settings as above. The resultant  
541 alignments and trees were subjected to coalescent tree reconstruction using ASTRAL-II software  
542 (100). Overall, both phylogenies largely agreed except for branching patterns of some lineages  
543 (e.g., Zoopagomycota and Mucoromycota) and are available online in a figshare repository (see  
544 *Data Sharing* below)

545 The predicted amino acid and intronless nucleotide sequences of fungal *napA*, *nirK*, and  
546 *p450nor* gene models were aligned using the MAFFT settings described above and manually  
547 refined in JalView and SeaView software (101, 102). Maximum-likelihood (ML) and Bayesian  
548 phylogenetic tree reconstruction was performed on both nucleotide and amino acid alignments  
549 using RAxML and MrBayes, respectively (103, 104). Selection of the optimal evolutionary  
550 model for ML tree reconstruction was performed using protest (105) (amino acid alignment) and  
551 jmodeltest (106) (nucleotide alignment) software prior to ML tree reconstruction. Please refer to  
552 SI for additional details about evolutionary models used in phylogenetic analysis.

553 Phylogenetic analysis with RAxML was performed by sampling 20 starting trees and  
554 performing 1,000 replicate bootstrap analyses. The tree with the maximal negative log likelihood  
555 score was compared to 1,000 replicates in RAxML to generate the final tree. Bayesian tree  
556 construction was performed using 3 independent runs with 6 chains for 5,000,000 generations.  
557 Output from MrBayes was evaluated with the sump and sumt commands within the software to  
558 ensure Markov Chain Monte Carlo chain mixing and convergence (potential scale reduction  
559 factor of 1.0) and standard deviation of split frequencies  $\sim 0.01$  or lower. MrBayes output was  
560 further visualized in the program Tracer (<http://tree.bio.ed.ac.uk/software/tracer/>) to ensure  
561 convergence was reached.



562 BayesTraits software was used to perform phylogenetically informed correlations  
563 between binary traits (i.e., the presence or absence of two denitrification markers) and ancestral  
564 state reconstruction (107). Please refer to SI for additional details on BayesTraits analyses.

565 Approximately unbiased (AU) tests were performed in the program CONSEL (108) using  
566 default settings. The negative log likelihood values from the observed nucleotide phylogenies  
567 input into CONSEL were -140,261, -37,782, -111,531 for *napA*, *nirK* and *p450nor*, respectively.  
568 The observed negative log likelihood scores for amino acid phylogenies of NapA, NirK, and  
569 P450nor were -65,158, -14,197, and -44,171, respectively. Species-tree gene-tree reconciliation  
570 was performed using NOTUNG software v2.9 (38, 109). Please see SI for further details on  
571 NOTUNG parameters.

#### 572 *Statistical analysis*

573 All statistical analyses were carried out in R programming language (110) and significance of  
574 statistical tests were assessed using a  $p$  value cutoff  $\leq 0.05$ .

#### 575 *Data sharing*

576 All gene models, alignments, and trees discussed in the manuscript are made available in a  
577 figshare repository prepared by S.A.H. (<https://doi.org/10.6084/m9.figshare.c.3845692>).

#### 578 **Acknowledgements**

579 We thank Gerald Bills, Gregory Bonito, Pedro Crous, Kathryn Bushley, Colleen Hansel, Patrik  
580 Inderbitzin, Gabor Kovacs, Bjorn Lindahl, Jon Magnuson, Francis Martin, Kerry O'Donnell,  
581 Nancy Nichols, Minou Nowrousian, and Joseph Spatafora for providing access to unpublished  
582 genome data produced by the U.S. Department of Energy Joint Genome Institute. The authors  
583 thank A. Frank for assistance with manuscript revisions. S.A.H. would like to acknowledge a  
584 Department of Energy Office of Science Graduate Student Research fellowship for support

585 during preparation of the manuscript. Participation of C.W.S and F.E.L. was partially sponsored  
586 by the Laboratory Directed Research and Development Program of Oak Ridge National  
587 Laboratory, managed by UT-Battelle, LLC, for the U. S. Department of Energy. This research  
588 was partially supported by the US Department of Energy, Office of Biological and  
589 Environmental Research, Genomic Science Program, Award DE-SC0006662.

590

## 591 **References**

592

- 593 1. **Canfield DE, Glazer AN, Falkowski PG.** 2010. The evolution and future of Earth's  
594 nitrogen cycle. *Science* **330**:192–6.  
595
- 596 2. **Galloway JN, Townsend AR, Erismann JW, Bekunda M, Cai Z, Freney JR, Martinelli**  
597 **L a, Seitzinger SP, Sutton M a.** 2008. Transformation of the nitrogen cycle: Recent  
598 trends, questions, and potential solutions. *Science* (80-. ). **320**:889–892.  
599
- 600 3. **Zumft WG.** 1997. Cell biology and molecular basis of denitrification. *Microbiol. Mol.*  
601 *Biol. Rev.* **61**:533–616.  
602
- 603 4. **Mothapo N, Chen H, Cubeta MA, Grossman JM, Fuller F, Shi W.** 2015.  
604 Phylogenetic, taxonomic and functional diversity of fungal denitrifiers and associated N<sub>2</sub>O  
605 production efficacy. *Soil Biol. Biochem.* **83**:160–175.  
606
- 607 5. **Wankel SD, Ziebis W, Buchwald C, Charoenpong C, de Beer D, Dentinger J, Xu Z,**  
608 **Zengler K.** 2017. Evidence for fungal and chemodenitrification based N<sub>2</sub>O flux from  
609 nitrogen impacted coastal sediments **8**:15595.  
610
- 611 6. **Cathrine SJ, Raghukumar C.** 2009. Anaerobic denitrification in fungi from the coastal  
612 marine sediments off Goa, India. *Mycol. Res.* **113**:100–109.  
613
- 614 7. **Shoun H, Fushinobu S, Jiang L, Kim S-W, Wakagi T.** 2012. Fungal denitrification and  
615 nitric oxide reductase cytochrome P450nor. *Philos. Trans. R. Soc. Lond. B. Biol. Sci.*  
616 **367**:1186–94.  
617
- 618 8. **Mothapo N V, Chen H, Cubeta MA, Shi W.** 2013. Nitrous oxide producing activity of  
619 diverse fungi from distinct agroecosystems. *Soil Biol. Biochem.* **66**:94–101.

- 620
- 621 9. **Chen H, Mothapo N V, Shi W.** 2014. The significant contribution of fungi to soil N<sub>2</sub>O  
622 production across diverse ecosystems. *Appl. Soil Ecol.* **73**:70–77.  
623
- 624 10. **Hu H-W, Chen D, He J-Z.** 2015. Microbial regulation of terrestrial nitrous oxide  
625 formation: understanding the biological pathways for prediction of emission rates. *FEMS*  
626 *Microbiol. Rev.* **39**:729–749.  
627
- 628 11. **Shiro Y, Fujii M, Iizuka T, Adachi S, Tsukamoto K, Nakahara K, Shoun H.** 1995.  
629 Spectroscopic and kinetic studies on reaction of cytochrome P450nor with nitric oxide:  
630 Implication for its nitric oxide reduction mechanism. *J. Biol. Chem.* **270**:1617–1623.  
631
- 632 12. **Nakahara K, Tanimoto T, Hatano K, Usuda K, Shoun H.** 1993. Cytochrome P-450  
633 55A1 (P-450dNIR) acts as nitric oxide reductase employing NADH as the direct electron  
634 donor. *J. Biol. Chem.* **268** :8350–8355.  
635
- 636 13. **Shimizu H, Park S-Y, Shiro Y, Adachi S.** 2002. X-ray structure of nitric oxide reductase  
637 (cytochrome P450nor) at atomic resolution. *Acta Crystallogr. Sect. D* **58**:81–89.  
638
- 639 14. **Novinscak A, Goyer C, Zebarth BJ, Burton DL, Chantigny MH, Filion M.** 2016.  
640 Novel *P450nor* gene detection assay used to characterize the prevalence and diversity of  
641 soil fungal denitrifiers. *Appl. Environ. Microbiol.* **82**:4560–4569.  
642
- 643 15. **Li Y, Liu Q, Liang X, Xiao Q, Fang Y, Wu Y.** 2016. A new fluorescence biosensor for  
644 nitric oxide detection based on cytochrome P450 55B1. *Sensors Actuators B Chem.*  
645 **230**:405–410.  
646
- 647 16. **Higgins SA, Welsh A, Orellana LH, Konstantinidis KT, Chee-Sanford JC, Sanford**  
648 **RA, Schadt CW, Löffler FE.** 2016. Detection and diversity of fungal nitric oxide  
649 reductase genes (*p450nor*) in agricultural soils. *Appl. Environ. Microbiol.* **82**:2919–2928.  
650
- 651 17. **Mahne I, Tiedje JM.** 1995. Criteria and methodology for identifying respiratory  
652 denitrifiers. *Appl. Environ. Microbiol.* **61**:1110–1115.  
653
- 654 18. **Shoun H.** 1992. Denitrification by fungi. *FEMS Microbiol. Lett.* **94**:277–281.  
655
- 656 19. **Tsuruta S, Takaya N, Zhang L, Shoun H, Kimura K, Hamamoto M, Nakase T.** 1998.  
657 Denitrification by yeasts and occurrence of cytochrome P450nor in *Trichosporon*  
658 *cutaneum*. *FEMS Microbiol. Lett.* **168**:105–110.

- 659
- 660 20. **Bleakley BH, Tiedje JM.** 1982. Nitrous oxide production by organisms other than  
661 nitrifiers or denitrifiers. *Appl. Environ. Microbiol.* **44** :1342–1348.  
662
- 663 21. **Stief P, Fuchs-Ocklenburg S, Kamp A, Manohar C-S, Houbraken J, Boekhout T, de**  
664 **Beer D, Stoeck T.** 2014. Dissimilatory nitrate reduction by *Aspergillus terreus* isolated  
665 from the seasonal oxygen minimum zone in the Arabian Sea. *BMC Microbiol.* **14**:35.  
666
- 667 22. **Zhou Z, Takaya N, Sakairi MAC, Shoun H.** 2001. Oxygen requirement for  
668 denitrification by the fungus *Fusarium oxysporum*. *Arch. Microbiol.* **175**:19–25.  
669
- 670 23. **Shoun H, Tanimoto T.** 1991. Denitrification by the fungus *Fusarium oxysporum* and  
671 involvement of cytochrome P-450 in the respiratory nitrite reduction. *J. Biol. Chem.*  
672 **266**:11078–11082.  
673
- 674 24. **Herold MB, Baggs EM, Daniell TJ.** 2012. Fungal and bacterial denitrification are  
675 differently affected by long-term pH amendment and cultivation of arable soil. *Soil Biol.*  
676 *Biochem.* **54**:25–35.  
677
- 678 25. **Rousk J, Demoling LA, Bååth E.** 2009. Contrasting short-term antibiotic effects on  
679 respiration and bacterial growth compromises the validity of the selective respiratory  
680 inhibition technique to distinguish fungi and bacteria. *Microb. Ecol.* **58**:75–85.  
681
- 682 26. **Ladan S, Jacinthe P-A.** 2016. Evaluation of antibacterial and antifungal compounds for  
683 selective inhibition of denitrification in soils. *Environ. Sci. Process. Impacts.*  
684
- 685 27. **Phillips RL, Song B, McMillan AMS, Grelet G, Weir BS, Palmada T, Tobias C.** 2016.  
686 Chemical formation of hybrid di-nitrogen calls fungal codenitrification into question. *Sci.*  
687 *Rep.* **6**:39077.  
688
- 689 28. **Moktali V, Park J, Fedorova-Abrams N, Park B, Choi J, Lee Y-H, Kang S.** 2012.  
690 Systematic and searchable classification of cytochrome P450 proteins encoded by fungal  
691 and oomycete genomes. *BMC Genomics* **13**:525.  
692
- 693 29. **Kizawa H, Tomura D, Oda M, Fukamizu A, Hoshino T, Gotoh O, Yasui T, Shoun H.**  
694 1991. Nucleotide sequence of the unique nitrate/nitrite-inducible cytochrome P-450 cDNA  
695 from *Fusarium oxysporum*. *J. Biol. Chem.* **266**:10632–10637.  
696
- 697 30. **Chen W, Lee M-K, Jefcoate C, Kim S-C, Chen F, Yu J-H.** 2014. Fungal cytochrome

- 698 P450 monooxygenases: their distribution, structure, functions, family expansion, and  
699 evolutionary origin. *Genome Biol. Evol.* **6**:1620–1634.  
700
- 701 31. **Shoun H, Kano M, Baba I, Takaya N, Matsuo M.** 1998. Denitrification by  
702 actinomycetes and purification of dissimilatory nitrite reductase and azurin from  
703 *Streptomyces thioluteus*. *J. Bacteriol.* **180**:4413–4415.  
704
- 705 32. **Shapleigh JP.** 2013. Denitrifying prokaryotes, p. 405–425. *In* Rosenberg, E, DeLong, EF,  
706 Lory, S, Stackebrandt, E, Thompson, F (eds.), *The prokaryotes: Prokaryotic physiology*  
707 *and biochemistry*. Springer Berlin Heidelberg, Berlin, Heidelberg.  
708
- 709 33. **Kumon Y, Sasaki Y, Kato I, Takaya N, Shoun H, Beppu T.** 2002. Codenitrification  
710 and denitrification are dual metabolic pathways through which dinitrogen evolves from  
711 nitrate in *Streptomyces antibioticus*. *J. Bacteriol.* **184**:2963–2968.  
712
- 713 34. **Moody SC, Loveridge EJ.** 2014. CYP105—diverse structures, functions and roles in an  
714 intriguing family of enzymes in *Streptomyces*. *J. Appl. Microbiol.* **117**:1549–1563.  
715
- 716 35. **Blackwell M, Hibbett DS, Taylor JW, Spatafora JW.** 2006. Research coordination  
717 networks: a phylogeny for kingdom Fungi (Deep Hypha). *Mycologia* **98**:829–837.  
718
- 719 36. **Martin F, Cullen D, Hibbett D, Pisabarro A, Spatafora JW, Baker SE, Grigoriev I V.**  
720 2011. Sequencing the fungal tree of life. *New Phytol.* **190**:818–821.  
721
- 722 37. **Maeda K, Spor A, Edel-Hermann V, Heraud C, Breuil M-C, Bizouard F, Toyoda S,**  
723 **Yoshida N, Steinberg C, Philippot L.** 2015. N<sub>2</sub>O production, a widespread trait in fungi.  
724 *Sci. Rep.* **5**.  
725
- 726 38. **Stolzer M, Lai H, Xu M, Sathaye D, Vernot B, Durand D.** 2012. Inferring duplications,  
727 losses, transfers and incomplete lineage sorting with nonbinary species trees. *Bioinforma.*  
728 **28** :i409–i415.  
729
- 730 39. **Nelson DR.** 2009. The cytochrome P450 homepage. *Hum. Genomics* **4**:59–65.  
731
- 732 40. **Barry SM, Kers JA, Johnson EG, Song L, Aston PR, Patel B, Krasnoff SB, Crane**  
733 **BR, Gibson DM, Loria R, Challis GL.** 2012. Cytochrome P450–catalyzed L-tryptophan  
734 nitration in thaxtomin phytotoxin biosynthesis. *Nat Chem Biol* **8**:814–816.  
735
- 736 41. **Dodani SC, Cahn JKB, Heinisch T, Brinkmann-Chen S, McIntosh JA, Arnold FH.**

- 737 2014. Structural, functional, and spectroscopic characterization of the substrate scope of  
738 the novel nitrating cytochrome P450 TxtE. *Chembiochem* **15**:2259–2267.  
739
- 740 42. **Morozkina E V., Kurakov A V.** 2007. Dissimilatory nitrate reduction in fungi under  
741 conditions of hypoxia and anoxia: A review. *Appl. Biochem. Microbiol.* **43**:544–549.  
742
- 743 43. **Poole RK, Hughes MN.** 2000. New functions for the ancient globin family: bacterial  
744 responses to nitric oxide and nitrosative stress. *Mol. Microbiol.* **36**:775–783.  
745
- 746 44. **Wisecaver JH, Alexander WG, King SB, Todd Hittinger C, Rokas A.** 2016. Dynamic  
747 evolution of nitric oxide detoxifying flavohemoglobins, a family of single-protein  
748 metabolic modules in *Bacteria* and Eukaryotes. *Mol. Biol. Evol.*  
749
- 750 45. **Kaspar HF.** 1982. Nitrite reduction to nitrous oxide by propionibacteria: Detoxification  
751 mechanism. *Arch. Microbiol.* **133**:126–130.  
752
- 753 46. **O’Keefe DP, Harder PA.** 1991. Occurrence and biological function of cytochrome P450  
754 monooxygenases in the actinomycetes. *Mol. Microbiol.* **5**:2099–2105.  
755
- 756 47. **Wolf T, Shelest V, Nath N, Shelest E.** 2016. CASSIS and SMIPS: promoter-based  
757 prediction of secondary metabolite gene clusters in eukaryotic genomes. *Bioinforma.* **32**  
758 :1138–1143.  
759
- 760 48. **Shoun H.** 1992. Fungal denitrification and cytochrome P-450. *J. Agric. Chem. Soc. Japan*  
761 **66**:154–157.  
762
- 763 49. **Guengerich FP, Munro AW.** 2013. Unusual cytochrome P450 enzymes and reactions. *J.*  
764 *Biol. Chem.* **288**:17065–17073.  
765
- 766 50. **Toyoda S, Yoshida N, Koba K.** 2017. Isotopocule analysis of biologically produced  
767 nitrous oxide in various environments. *Mass Spectrom. Rev.* **36**:135–160.  
768
- 769 51. **Yang H, Gandhi H, Ostrom NE, Hegg EL.** 2014. Isotopic fractionation by a fungal  
770 P450 nitric oxide reductase during the production of N<sub>2</sub>O. *Environ. Sci. Technol.*  
771 **48**:10707–10715.  
772
- 773 52. **Decock C, Six J.** 2013. How reliable is the intramolecular distribution of <sup>15</sup>N in N<sub>2</sub>O to  
774 source partition N<sub>2</sub>O emitted from soil? *Soil Biol. Biochem.* **65**:114–127.  
775

- 776 53. **Baggs EM.** 2008. A review of stable isotope techniques for N<sub>2</sub>O source partitioning in  
777 soils: recent progress, remaining challenges and future considerations. *Rapid Commun.*  
778 *Mass Spectrom.* **22**:1664–1672.  
779
- 780 54. **Butterbach-Bahl K, Baggs EM, Dannenmann M, Kiese R, Zechmeister-Boltenstern**  
781 **S.** 2013. Nitrous oxide emissions from soils: how well do we understand the processes and  
782 their controls? *Philos. Trans. Biol. Sci.* **368**:1–13.  
783
- 784 55. **Kurakov A V, Nosikov AN, Skrynnikova E V, L’vov NP.** 2000. Nitrate reductase and  
785 nitrous oxide production by *Fusarium oxysporum* 11dn1 under aerobic and anaerobic  
786 conditions. *Curr. Microbiol.* **41**:114–119.  
787
- 788 56. **Tsuruta S, Takaya N, Zhang L, Shoun H, Kimura K, Hamamoto M, Nakase T.** 1998.  
789 Denitrification by yeasts and occurrence of cytochrome P450nor in *Trichosporon*  
790 *cutaneum*. *FEMS Microbiol. Lett.* **168**:105–110.  
791
- 792 57. **Rohe L, Anderson T, Braker G, Flessa H, Giesemann A, Lewicka-Szczebak D,**  
793 **Wrage-Monnig N, Well R.** 2014. Dual isotope and isotopomer signatures of nitrous  
794 oxide from fungal denitrification - a pure culture study. *Rapid Commun. Mass Spectrom.*  
795 **28**:1893–1903.  
796
- 797 58. **Zumft WG.** 2005. Nitric oxide reductases of prokaryotes with emphasis on the  
798 respiratory, heme–copper oxidase type. *J. Inorg. Biochem.* **99**:194–215.  
799
- 800 59. **Gardner PR, Gardner AM, Martin LA, Dou Y, Li T, Olson JS, Zhu H, Riggs AF.**  
801 2000. Nitric-oxide dioxygenase activity and function of flavohemoglobins: Sensitivity to  
802 nitric oxide and carbon monoxide inhibition. *J. Biol. Chem.* **275**:31581–31587.  
803
- 804 60. **Yasutake Y, Imoto N, Fujii Y, Fujii T, Arisawa A, Tamura T.** 2007. Crystal structure  
805 of cytochrome P450 MoxA from *Nonomuraea recticatena* (CYP105). *Biochem. Biophys.*  
806 *Res. Commun.* **361**:876–882.  
807
- 808 61. **Stassi D, Donadio S, Staver MJ, Katz L.** 1993. Identification of a *Saccharopolyspora*  
809 *erythraea* gene required for the final hydroxylation step in erythromycin biosynthesis. *J.*  
810 *Bacteriol.* **175**:182–189.  
811
- 812 62. **Clevenger KD, Bok JW, Ye R, Miley GP, Verdán MH, Velk T, Chen C, Yang K,**  
813 **Robey MT, Gao P, Lamprecht M, Thomas PM, Islam MN, Palmer JM, Wu CC,**  
814 **Keller NP, Kelleher NL.** 2017. A scalable platform to identify fungal secondary  
815 metabolites and their gene clusters. *Nat Chem Biol* **13**:895–901.

- 816
- 817 63. **Chen S, Wang J, Lin X, Zhao B, Wei X, Li G, Kaliaperumal K, Liao S, Yang B,**  
818 **Zhou X, Liu J, Xu S, Liu Y.** 2016. Chrysamides A–C, three dimeric nitrophenyl trans-  
819 epoxyamides produced by the deep-sea-derived fungus *Penicillium chrysogenum*  
820 SCSIO41001. *Org. Lett.* **18**:3650–3653.  
821
- 822 64. **Kovacic P, Somanathan R.** 2014. Nitroaromatic compounds: Environmental toxicity,  
823 carcinogenicity, mutagenicity, therapy and mechanism. *J. Appl. Toxicol.* **34**:810–824.  
824
- 825 65. **Keller NP.** 2015. Translating biosynthetic gene clusters into fungal armor and weaponry.  
826 *Nat Chem Biol* **11**:671–677.  
827
- 828 66. **Macheleidt J, Mattern DJ, Fischer J, Netzker T, Weber J, Schroeckh V, Valiante V,**  
829 **Brakhage AA.** 2016. Regulation and role of fungal secondary metabolites. *Annu. Rev.*  
830 *Genet.* **50**:371–392.  
831
- 832 67. **Janssen PH, Yates PS, Grinton BE, Taylor PM, Sait M.** 2002. Improved culturability  
833 of soil bacteria and isolation in pure culture of novel members of the divisions  
834 *Acidobacteria, Actinobacteria, Proteobacteria, and Verrucomicrobia.* *Appl. Environ.*  
835 *Microbiol.* **68** :2391–2396.  
836
- 837 68. **Chen H, Walsh CT.** 2001. Coumarin formation in novobiocin biosynthesis:  $\beta$ -  
838 hydroxylation of the aminoacyl enzyme tyrosyl-S-NovH by a cytochrome P450 NovI.  
839 *Chem. Biol.* **8**:301–312.  
840
- 841 69. **Ninnemann H, Maier J.** 1996. Indications for the occurrence of nitric oxide synthases in  
842 fungi and plants and the involvement in photoconidiation of *Neurospora crassa*.  
843 *Photochem. Photobiol.* **64**:393–398.  
844
- 845 70. **Samalova M, Johnson J, Illes M, Kelly S, Fricker M, Gurr S.** 2013. Nitric oxide  
846 generated by the rice blast fungus *Magnaporthe oryzae* drives plant infection. *New Phytol.*  
847 **197**:207–222.  
848
- 849 71. **Spatafora JW, Chang Y, Benny GL, Lazarus K, Smith ME, Berbee ML, Bonito G,**  
850 **Corradi N, Grigoriev I, Gryganskyi A, James TY, O'Donnell K, Roberson RW,**  
851 **Taylor TN, Uehling J, Vilgalys R, White MM, Stajich JE.** 2016. A phylum-level  
852 phylogenetic classification of zygomycete fungi based on genome-scale data. *Mycol.* **108**  
853 :1028–1046.  
854



- 855 72. **Weathers PJ.** 1984. N<sub>2</sub>O evolution by green algae. *Appl. Environ. Microbiol.* **48**:1251–  
856 1253.  
857
- 858 73. **Guieysse B, Plouviez M, Coilhac M, Cazali L.** 2013. Nitrous oxide (N<sub>2</sub>O) production in  
859 axenic *Chlorella vulgaris* microalgae cultures: evidence, putative pathways, and potential  
860 environmental impacts. *Biogeosciences* **10**:6737–6746.  
861
- 862 74. **Plouviez M, Wheeler D, Shilton A, Packer MA, McLenachan PA, Sanz-Luque E,**  
863 **Ocana-Calahorro F, Fernandez E, Guieysse B.** 2017. The biosynthesis of nitrous oxide  
864 in the green alga *Chlamydomonas reinhardtii*. *Plant J.*  
865
- 866 75. **Philippot L.** 2005. Denitrification in pathogenic bacteria: for better or worst? *Trends*  
867 *Microbiol.* **13**:191–192.  
868
- 869 76. **Myburg AA, den Berg N, Viljoen A.** 2013. Pathogenicity associated genes in *Fusarium*  
870 *oxysporum* f. sp. *cubense* race 4. *S. Afr. J. Sci.* **109**:1–10.  
871
- 872 77. **McFadden HG, Wilson IW, Chapple RM, Dowd C.** 2006. *Fusarium* wilt (*Fusarium*  
873 *oxysporum* f. sp. *vasinfectum*) genes expressed during infection of cotton (*Gossypium*  
874 *hirsutum*)†. *Mol. Plant Pathol.* **7**:87–101.  
875
- 876 78. **Jones CM, Welsh A, Throback IN, Dörsch P, Bakken LR, Hallin S.** 2011. Phenotypic  
877 and genotypic heterogeneity among closely related soil-borne N<sub>2</sub>- and N<sub>2</sub>O-producing  
878 *Bacillus* isolates harboring the *nosZ* gene. *FEMS Microbiol. Ecol.* **76**:541–52.  
879
- 880 79. **Graf DRH, Jones CM, Hallin S.** 2014. Intergenomic comparisons highlight modularity  
881 of the denitrification pathway and underpin the importance of community structure for  
882 N<sub>2</sub>O emissions. *PLoS One* **9**.  
883
- 884 80. **Philippot L.** 2002. Denitrifying genes in bacterial and archaeal genomes. *Biochim.*  
885 *Biophys. Acta - Gene Struct. Expr.* **1577**:355–376.  
886
- 887 81. **Simão FA, Waterhouse RM, Ioannidis P, Kriventseva E V, Zdobnov EM.** 2015.  
888 BUSCO: assessing genome assembly and annotation completeness with single-copy  
889 orthologs. *Bioinformatics* **31**:3210–3212.  
890
- 891 82. **She R, Chu JS-C, Uyar B, Wang J, Wang K, Chen N.** 2011. genBlastG: using BLAST  
892 searches to build homologous gene models. *Bioinforma.* **27** :2141–2143.  
893

- 894 83. **Altschul SF, Gish W, Miller W, Myers EW, Lipman DJ.** 1990. Basic local alignment  
895 search tool. *J. Mol. Biol.* **215**:403–410.  
896
- 897 84. **Li W, Cowley A, Uludag M, Gur T, McWilliam H, Squizzato S, Park YM, Buso N,**  
898 **Lopez R.** 2015. The EMBL-EBI bioinformatics web and programmatic tools framework.  
899 *Nucleic Acids Res.* **43**:W580–W584.  
900
- 901 85. **Mistry J, Bateman A, Finn RD.** 2007. Predicting active site residue annotations in the  
902 Pfam database. *BMC Bioinformatics* **8**:298.  
903
- 904 86. **Finn RD, Mistry J, Tate J, Coggill P, Heger A, Pollington JE, Gavin OL,**  
905 **Gunasekaran P, Ceric G, Forslund K, Holm L, Sonnhammer ELL, Eddy SR,**  
906 **Bateman A.** 2010. The Pfam protein families database . *Nucleic Acids Res.* **38** :D211–  
907 D222.  
908
- 909 87. 2015. UniProt: a hub for protein information. *Nucleic Acids Res.* **43**:D204–D212.  
910
- 911 88. **Fish J, Chai B, Wang Q, Sun Y, Brown CT, Tiedje J, Cole J.** 2013. FunGene: the  
912 functional gene pipeline and repository. *Front. Microbiol.* **4**:291.  
913
- 914 89. **Pruitt KD, Tatusova T, Maglott DR.** 2007. NCBI reference sequences (RefSeq): a  
915 curated non-redundant sequence database of genomes, transcripts and proteins. *Nucleic*  
916 *Acids Res.* **35** :D61–D65.  
917
- 918 90. **Korf I.** 2004. Gene finding in novel genomes. *BMC Bioinformatics* **5**:59.  
919
- 920 91. **Inglis D, Binkley J, Skrzypek M, Arnaud M, Cerqueira G, Shah P, Wymore F,**  
921 **Wortman J, Sherlock G.** 2013. Comprehensive annotation of secondary metabolite  
922 biosynthetic genes and gene clusters of *Aspergillus nidulans*, *A. fumigatus*, *A. niger* and *A.*  
923 *oryzae*. *BMC Microbiol.* **13**:91.  
924
- 925 92. **Eddy SR.** 2009. A new generation of homology search tools based on probabilistic  
926 inference. *Genome Inform.* **23**:205–211.  
927
- 928 93. **Powell S, Szklarczyk D, Trachana K, Roth A, Kuhn M, Muller J, Arnold R, Rattei T,**  
929 **Letunic I, Doerks T, Jensen LJ, von Mering C, Bork P.** 2012. eggNOG v3.0:  
930 orthologous groups covering 1133 organisms at 41 different taxonomic ranges. *Nucleic*  
931 *Acids Res.* **40**:D284–D289.  
932

- 933 94. **Emms DM, Kelly S.** 2015. OrthoFinder: solving fundamental biases in whole genome  
934 comparisons dramatically improves orthogroup inference accuracy. *Genome Biol.* **16**:1–  
935 14.  
936
- 937 95. **Richter M, Rosselló-Móra R.** 2009. Shifting the genomic gold standard for the  
938 prokaryotic species definition. *Proc. Natl. Acad. Sci.* **106** :19126–19131.  
939
- 940 96. **Kurtz S, Phillippy A, Delcher AL, Smoot M, Shumway M, Antonescu C, Salzberg**  
941 **SL.** 2004. Versatile and open software for comparing large genomes. *Genome Biol.*  
942 **5**:R12.  
943
- 944 97. **Hunter JD.** 2007. Matplotlib: A 2D graphics environment. *Comput. Sci. Eng.* **9**:90–95.  
945
- 946 98. **Katoh K, Asimenos G, Toh H.** 2009. Multiple alignment of DNA sequences with  
947 MAFFT. *Methods Mol. Biol.* **537**:39–64.  
948
- 949 99. **Price MN, Dehal PS, Arkin AP.** 2010. FastTree 2 – approximately maximum-likelihood  
950 trees for large alignments. *PLoS One* **5**:e9490.  
951
- 952 100. **Mirarab S, Warnow T.** 2015. ASTRAL-II: coalescent-based species tree estimation with  
953 many hundreds of taxa and thousands of genes. *Bioinformatics* **31**:i44–i52.  
954
- 955 101. **Waterhouse AM, Procter JB, Martin DMA, Clamp M, Barton GJ.** 2009. Jalview  
956 Version 2—a multiple sequence alignment editor and analysis workbench. *Bioinforma.*  
957 **25** :1189–1191.  
958
- 959 102. **Galtier N, Gouy M, Gautier C.** 1996. SEAVIEW and PHYLO\_WIN: two graphic tools  
960 for sequence alignment and molecular phylogeny. *Comput. Appl. Biosci.* **12**:543–548.  
961
- 962 103. **Stamatakis A.** 2006. RAxML-VI-HPC: maximum likelihood-based phylogenetic  
963 analyses with thousands of taxa and mixed models. *Bioinformatics* **22**:2688–90.  
964
- 965 104. **Ronquist F, Teslenko M, van der Mark P, Ayres DL, Darling A, Höhna S, Larget B,**  
966 **Liu L, Suchard MA, Huelsenbeck JP.** 2012. MrBayes 3.2: efficient bayesian  
967 phylogenetic inference and model choice across a large model space. *Syst. Biol.* **61**:539–  
968 542.  
969
- 970 105. **Abascal F, Zardoya R, Posada D.** 2005. ProtTest: selection of best-fit models of protein  
971 evolution. *Bioinforma.* **21** :2104–2105.

- 972
- 973 106. **Posada D.** 2008. jModelTest: Phylogenetic model averaging. *Mol. Biol. Evol.* **25**:1253–  
974 1256.  
975
- 976 107. **Pagel M, Meade A, Barker D.** 2004. Bayesian estimation of ancestral character states on  
977 phylogenies. *Syst. Biol.* **53**:673–684.  
978
- 979 108. **Shimodaira H, Hasegawa M.** 2001. CONSEL: for assessing the confidence of  
980 phylogenetic tree selection. *Bioinformatics* **17**:1246–1247.  
981
- 982 109. **Chen K, Durand D, Farach-Colton M.** 2000. NOTUNG: A program for dating gene  
983 duplications and optimizing gene family trees. *J. Comput. Biol.* **7**:429–447.  
984
- 985 110. **Team RDC.** 2012. R: A language and environment for statistical computing. R  
986 Foundation for Statistical Computing, Vienna, Austria.  
987

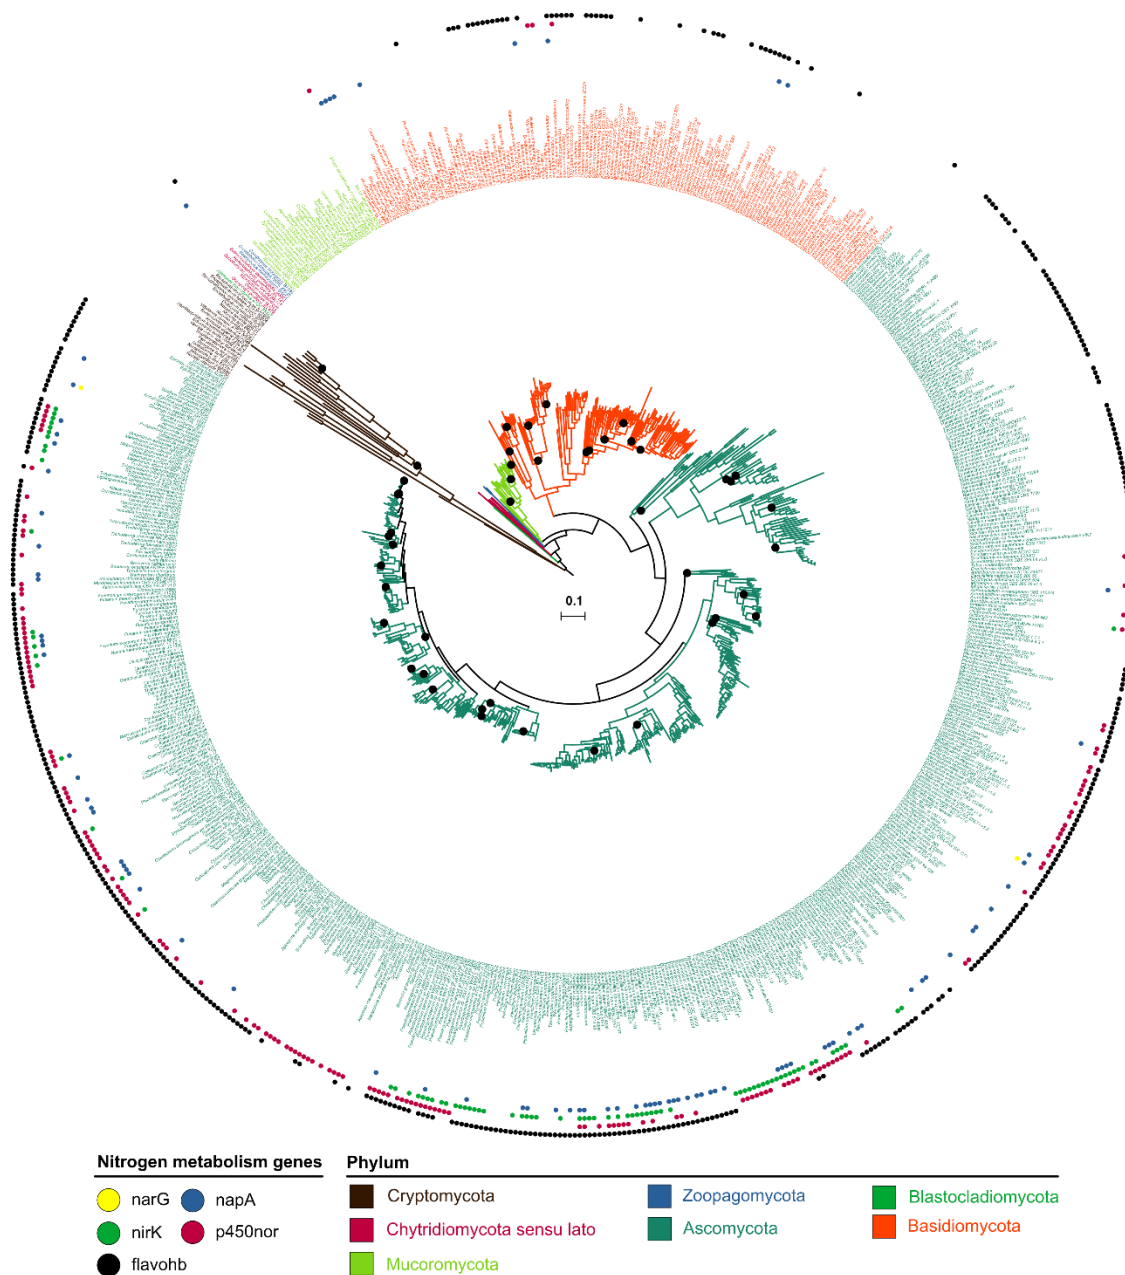

988

989 **Figure 1.** Maximum-Likelihood phylogeny of the kingdom Fungi inferred from a concatenated  
990 alignment of 238 single copy marker gene amino acid sequences (see Materials and Methods).  
991 Black circles marking branches indicate nodes with bootstrap percentages below 90%. Colored  
992 markers outside taxon names specify the presence or absence of each gene (narG, napA, nirK,  
993 p450nor, flavohemoglobin) within a fungal genome. Flavohb, flavohemoglobin genes involved in  
994 NO detoxification. The scale bar (center of tree) represents amino acid substitutions per site. A  
995 high-resolution file of the tree is available at <https://doi.org/10.6084/m9.figshare.c.3845692>.

996

997

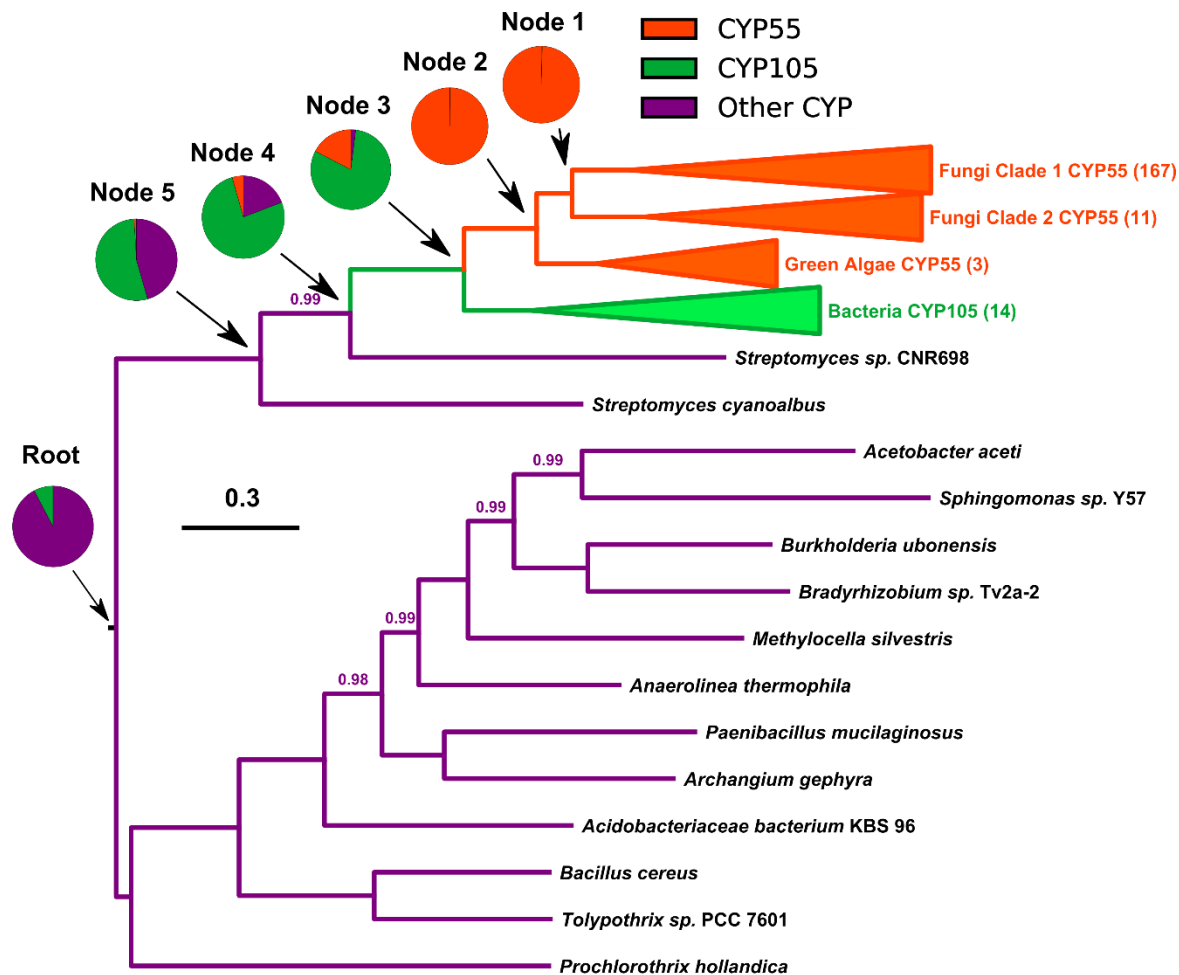

998

999 **Figure 2.** Midpoint-rooted Bayesian phylogeny of select families of cytochrome P450 amino  
1000 acid sequences from fungi, algae, and bacteria. Ancestral state reconstruction was performed  
1001 using CYP55 (orange), CYP105 (green), and other CYPs (purple) to uncover the shared ancestry  
1002 of algal and fungal N<sub>2</sub>O-producing cytochrome P450s with their most recent common bacterial  
1003 ancestor. The scale bar indicates substitutions per site and posterior probability values < 1 are  
1004 displayed above branches of the Bayesian MCMC analysis. Numbers in parentheses next to  
1005 collapsed clades indicate the number of sequences in the clade. Values in pie charts are average  
1006 probabilities of each character state across one representative Bayesian MCMC analysis.

1007

1008

1009

1010

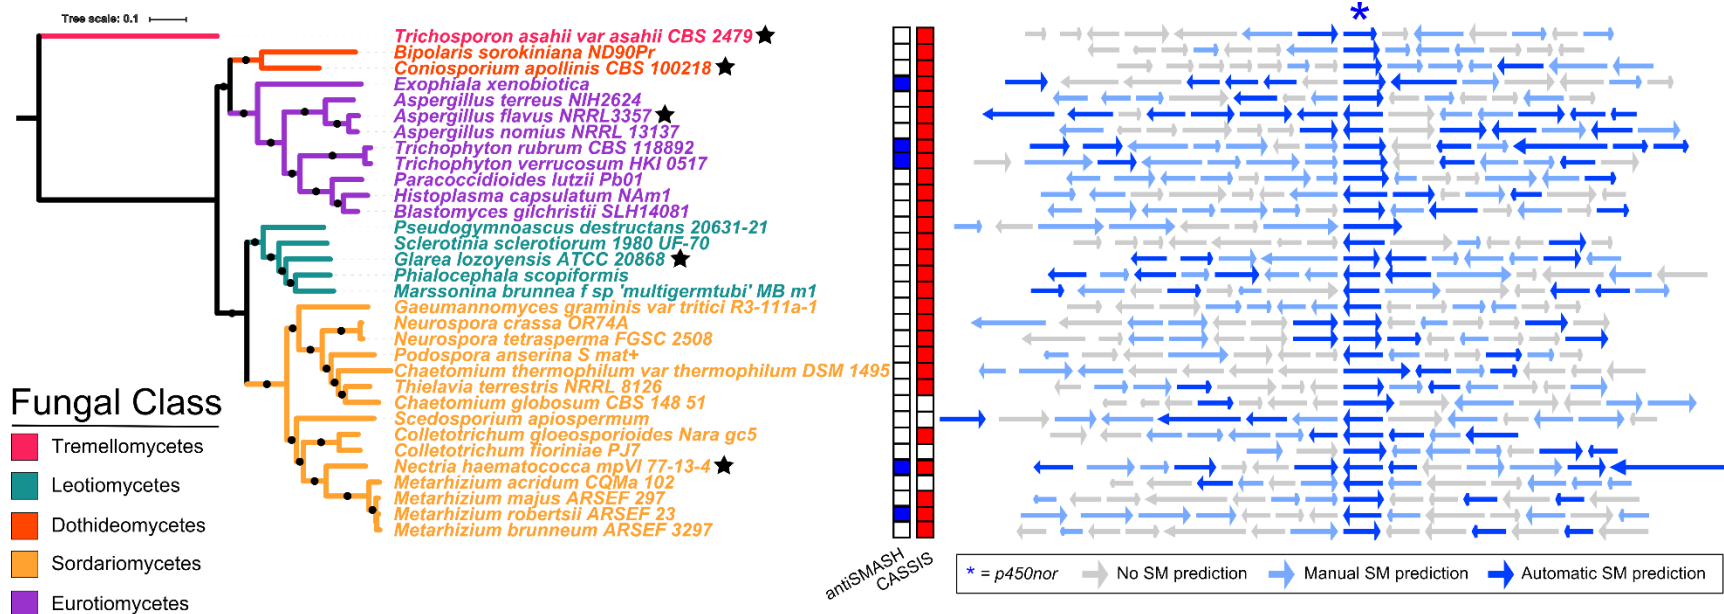

1011

1012 **Figure 3.** SM gene cluster predictions for a subset of 32 (167 total) *p450nor*-containing fungi. The boxes to the right of the rooted  
 1013 Maximum-Likelihood phylogeny indicate whether the *p450nor*-containing genomic region was predicted by antiSMASH (blue  
 1014 squares) or CASSIS (red squares) to be an SM gene cluster. White squares indicate no prediction. Colored arrows indicate protein-  
 1015 coding genes surrounding *p450nor* that were automatically predicted (dark blue arrow), manually predicted (light blue arrow) or not  
 1016 predicted (grey arrow) to be involved in SM (see Materials and Methods for details). The black stars next to species names are  
 1017 individuals chosen for in depth presentation of the genes surrounding *p450nor* (Fig. S9).

1018

1019

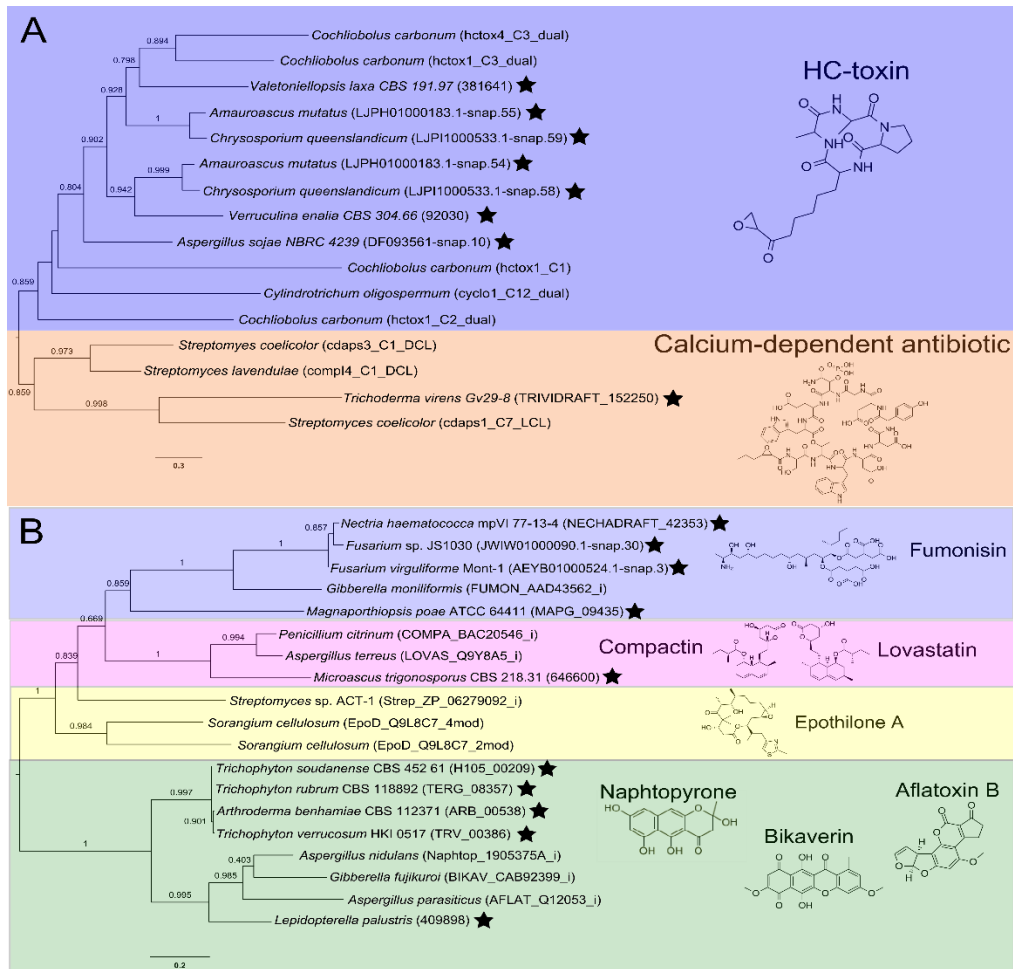

1020

1021 **Figure 4.** Maximum-Likelihood phylogenetic trees of non-ribosomal peptide synthase and  
 1022 polyketide synthase domains encoded within *p450nor*-containing genomic regions. Each  
 1023 phylogeny displays relationships of C-type condensation (C-type) (A) or ketosynthase (KS)  
 1024 domains (B) detected in non-ribosomal peptide and polyketide synthase amino acid sequences,  
 1025 respectively, encoded within *p450nor*-containing genomic regions. A black star next to taxa  
 1026 indicates C-type or KS domains identified in fungal genomes nearby *p450nor*. The NCBI or JGI  
 1027 accession numbers are shown in parentheses next to taxa with black stars. Taxa without black  
 1028 stars are reference amino acid sequences of C-type and KS domains curated by the NAPDOS  
 1029 database, and their NAPDOS accession numbers are indicated in parentheses. Proteins from  
 1030 species without accession numbers were predicted *ab initio* using SNAP (90) (see Materials and  
 1031 Methods for details). Chemical structures and names of secondary metabolites produced by  
 1032 NAPDOS reference sequences are indicated and highlighted distinct colors for clarity. Scale bars  
 1033 indicate amino acid substitutions per site. Values along branches indicate bootstrap support for  
 1034 the adjacent node.

1035



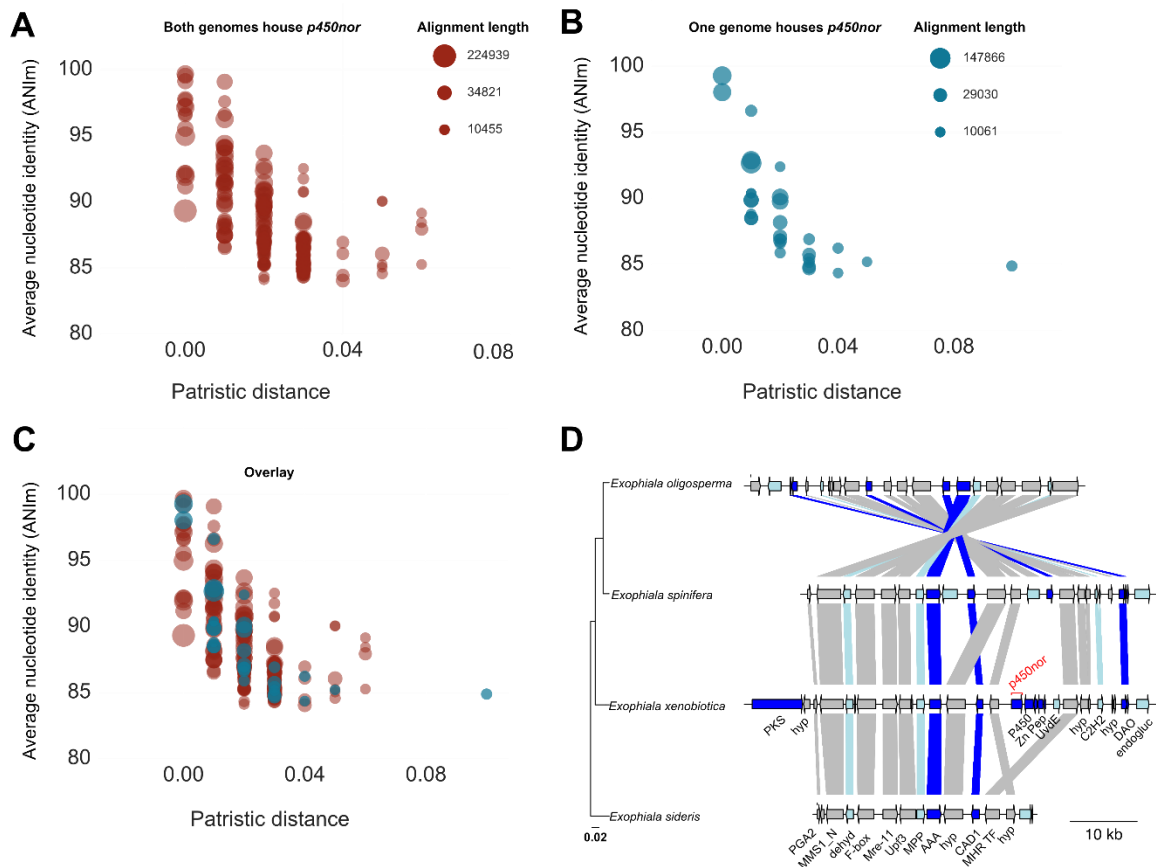

1036

1037 **Figure 5.** Within genera alignments of *p450nor*-containing genomic regions (N = 136) from  
 1038 species with and without *p450nor*. Alignment of two species with *p450nor*-containing genomic  
 1039 regions (red circles) (A) or between two species where only one member possesses *p450nor* (teal  
 1040 circles) (B). The overlay of the two plots in (C) indicates conservation of genomic architecture  
 1041 regardless of *p450nor* presence or absence. The size of the circles is proportional to the square  
 1042 root of the aligned length of the genomic regions. The gene synteny plot (D) highlights  
 1043 conservation of genomic architecture using a *p450nor*-containing genomic region from  
 1044 *Exophiala xenobiotica* aligned to three additional closely-related *Exophiala* species that do not  
 1045 possess *p450nor*. The arrows represent gene models within the gene region displayed. Both  
 1046 arrows and connecting lines above and below arrows are colored according to Figure 3 (see  
 1047 Materials and Methods for details). Lines connecting arrows between species indicate the genes  
 1048 are homologous. The scale bars (left to right) in (D) indicate substitutions per site and genome  
 1049 size in kilobases, respectively. The location of *p450nor* in *E. xenobiotica* is indicated in red font.  
 1050 The labels in black font describes the putative functions of proteins encoded by each gene. PKS -  
 1051 polyketide synthase, hyp – hypothetical protein, PGA2 – protein trafficking protein, MMS1\_N –  
 1052 MMS1-like protein, dehyd – dehydrogenase, F-box – F-box domain containing protein, Mre-11  
 1053 – double strand break repair protein Mre-11, Upf3 – nonsense mediated mRNA decay protein 3,  
 1054 MPP – metallophosphatase, AAA – ATPase, CAD1 – cinnamyl alcohol dehydrogenase, MHR  
 1055 TF – middle homology region transcription factor, P450 – cytochrome P450 reductase, Zn Pep –  
 1056 zinc peptidase superfamily protein, UvdE – UV-endonuclease, C2H2 – zinc finger C2H2 type,  
 1057 DAO – D-amino acid oxidase, endogluc – endoglucanase.

1058 **List of Supplemental Materials**

1059 **Table S1.** Counts of denitrification traits and their co-occurrences in fungal genomes.

1060 **Table S2.** Results from approximately unbiased tests for the monophyly of fungal classes within  
1061 *napA*, *nirK*, and *p450nor* gene trees. Where indicated, the monophyly of two lineages was also  
1062 assessed. Bold font data indicate that the AU test rejected the monophyly of the taxa. Test  
1063 significance was evaluated at  $p \leq 0.05$ .

1064 **Table S3.** Results from species-tree gene-tree reconciliation using NOTUNG software for *napA*,  
1065 *nirK*, and *p450nor* genes in fungi. Values are averages of solutions with standard deviations  
1066 reported in parentheses.

1067 **Table S4.** Predicted horizontal gene transfers of fungal *p450nor*, *napA*, and *nirK* genes based on  
1068 alien index algorithm.

1069 **Table S5.** List of genera containing species with and without *p450nor*.

1070 **Figure S1.** Gene abundances of *narG*, *napA*, *nirK*, *p450nor*, and flavohemoglobins (colored  
1071 bars) mapped on to fungal families (cladogram, left). Relationships among fungal families in the  
1072 cladogram were derived from the NCBI taxonomy using the online tool phyloT  
1073 (<http://phylot.biobyte.de/index.html>).

1074 **Figure S2.** Maximum-Likelihood phylogenies connecting fungal species with their respective  
1075 NO reductase (*p450nor*) gene sequence(s). On the left, an amino acid phylogeny of 238  
1076 concatenated single copy orthologues from fungal species in which one or more *p450nor* gene(s)  
1077 were detected. The *p450nor* nucleotide phylogeny (right) demonstrates many instances of  
1078 incongruence with the fungal species phylogeny. Black dots in each phylogeny represent  
1079 bootstrap percentages greater than or equal to 90%. Scale bars represent amino acid (left tree)  
1080 and nucleotide (right tree) substitutions per site. A high-resolution file of the tree is available at  
1081 <https://doi.org/10.6084/m9.figshare.c.3845692>.

1082 **Figure S3.** Cophylogenetic plot of *napA*-containing fungal species (left, N = 75) and the *napA*  
1083 nucleotide tree (right, N = 78). Both are midpoint rooted Maximum-Likelihood trees where black  
1084 dots represent bootstrap percentages  $\geq 90\%$ . Scale bars indicate substitutions per site for the  
1085 concatenated amino acid species phylogeny and nucleotide phylogeny, respectively. A high-  
1086 resolution file of the tree is available at <https://doi.org/10.6084/m9.figshare.c.3845692>.

1087 **Figure S4.** Cophylogenetic plot of *nirK*-containing fungal species (left, N = 82) and the *nirK*  
1088 nucleotide tree (right, N = 83). Both are midpoint rooted Maximum-Likelihood trees where black  
1089 dots represent bootstrap percentages  $\geq 90\%$ . Scale bars indicate substitutions per site for the  
1090 concatenated amino acid species phylogeny and nucleotide phylogeny, respectively. A high-  
1091 resolution file of the tree is available at <https://doi.org/10.6084/m9.figshare.c.3845692>.

1092 **Figure S5.** Plot of alien index values observed for *p450nor* genes (N = 178). Points above the  
1093 hashed line at the origin are indicative of HGT. Names of fungal species with alien index values

1094 above zero are ordered as their points appear on the graph. Thick horizontal lines represent the  
1095 median alien index value. See Materials and Methods in the main text for details on alien index  
1096 calculations.

1097 **Figure S6.** Bayesian tree reconstruction of actinobacterial and proteobacterial 16S rRNA genes  
1098 (left, N = 55) and cytochrome P450 family 105 amino acid sequences (right, N = 57). Both  
1099 phylogenies represent 50% majority-rule consensus trees. The tree on the left is rooted with  
1100 proteobacterial sequences as outgroup to the *Actinobacteria*. The tree on the right is midpoint  
1101 rooted. Nodes with posterior probabilities  $\geq 0.95$  are indicated by black circles on an adjacent  
1102 branch.

1103 **Figure S7.** Midpoint rooted Bayesian (left) and Maximum-Likelihood phylogenies (right) of  
1104 cytochrome P450 sequences (N = 408) demonstrating the affiliation of P450nor with other  
1105 sequences belonging to members of the bacterial phyla Actinobacteria and Proteobacteria.  
1106 Cyanobacterial cytochrome P450 sequences were included as outgroups. Black squares on  
1107 branches (left tree) indicate  $\geq 0.95$  posterior probability or  $\geq 90$  % bootstrap replication (right  
1108 tree). The colored legend indicates the cytochrome P450 family specified by shared amino acid  
1109 identity of  $\geq 40$  % (D.R. Nelson, Hum Genomics 4:59-65, 2009).

1110 **Figure S8.** Bayesian and Maximum-likelihood phylogenies of NapA, NirK, and P450nor amino  
1111 acid sequence homologs extracted from the RefSeq protein database. A high-resolution file of  
1112 these trees are available at <https://doi.org/10.6084/m9.figshare.c.3845692>.

1113 **Figure S9.** Genome regions chosen for in depth presentation of protein coding genes  
1114 surrounding *p450nor* in predicted BGC regions. Labels above genes are functional annotations  
1115 from alignments to the eggNOG database. NCBI gene loci accessions are labeled below each  
1116 gene.
